1

2 **A single nonsynonymous mutation on gene encoding E protein of Zika**  
3 **virus leads to increased neurovirulence *in vivo***

4

5 Zhihua Liu<sup>1 & 2#</sup>, Yawei Zhang<sup>3#</sup>, Mengli Cheng<sup>3</sup>, Ningning Ge<sup>1 & 2</sup>, Jiayi Shu<sup>1 & 4</sup>,  
6 Zhiheng Xu<sup>5</sup>, Yigang Tong<sup>3 & 6\*</sup>, Chengfeng Qin<sup>3\*</sup>, Xia Jin<sup>1 & 2\*</sup>

7

8 1. CAS Key Laboratory of Molecular Virology and Immunology, Institut Pasteur  
9 of Shanghai, Chinese Academy of Sciences, Shanghai, China.

10 2. University of Chinese Academy of Sciences, Beijing, China.

11 3. State Key Laboratory of Pathogen and Biosecurity, Beijing Institute of  
12 Microbiology and Epidemiology, Beijing, China.

13 4. Scientific Research Center, Shanghai Public Health Clinical Center &  
14 Institutes of Biomedical Sciences, Key Laboratory of Medical Molecular  
15 Virology of Ministry of Education/Health, Shanghai Medical College, Fudan  
16 University, Shanghai, China.

17 5. State Key Laboratory of Molecular Developmental Biology, CAS Center for  
18 Excellence in Brain Science and Intelligence Technology, Institute of  
19 Genetics and Developmental Biology, Chinese Academy of Sciences,  
20 Beijing, China.

21 6. College of Life Science and Technology, Beijing University of Chemical  
22 Technology, Beijing, China.

23

24

25 #These authors contributed equally to this work

26 \*Corresponding authors: Xia Jin ([xjin@ips.ac.cn](mailto:xjin@ips.ac.cn) or [27 \[path.com\]\(mailto:path.com\)\), or Chengfeng Qin \(\[qincf@bmi.ac.cn\]\(mailto:qincf@bmi.ac.cn\)\), or Yigang Tong](mailto:xia.jin@immune-</a></p></div><div data-bbox=)

28 ([tong.yigang@gmail.com](mailto:tong.yigang@gmail.com))

29

30

31

32 **Abstract:**

33 Zika virus can infect a wide range of tissues including the developmental brain  
34 of human fetuses, causing from mild to severe clinical diseases. Whether its  
35 genetic characteristics impacts on viral pathogenesis is incompletely  
36 understood. We have obtained viral variants through serially passage of a  
37 clinical Zika virus isolate (SW01) in neonatal mice *in vivo* and found some of  
38 which exhibited markedly increased virulence and neurotropism. By deep  
39 sequencing analysis, the more pathogenic viral variants were found to contain  
40 four dominant nonsynonymous nucleotide mutations on genes encoding E and  
41 NS2A proteins. Further investigation using molecularly cloned viruses revealed  
42 that a single 67D (Aspartic acid) to N (Asparagine) substitution on E protein is  
43 sufficient to confer the increased virulence and neurotropism. These findings  
44 provide new insight into Zika virus pathogenesis and suggest novel targets for  
45 the development of therapeutics.

46

47

48

49

50

51

52

53

54

55

56

57

58

59 **Author Summary:**

60 Recent large outbreaks of Zika virus infection worldwide have revealed an  
61 association between the viral infection and increased cases of specific  
62 neurological problems including Congenital Zika Syndrome (including  
63 microcephaly) and adult Guillain–Barré Syndrome. However, the determinants  
64 of the increased neurovirulence of Zika virus remain uncertain. One hypothesis  
65 is that some unique changes across the Zika viral genome have led to the  
66 occurrence of these neurological diseases. To test this hypothesis, we  
67 continuously propagated a clinical isolate of contemporary Zika virus (SW01) in  
68 neonatal mice brain for 11 times to obtain an mouse central nervous system  
69 (CNS) adapted Zika virus (MA-SW01) that showed significantly increased  
70 neurovirulence *in vivo*. We then discovered that a single G to A nucleotide  
71 substitution at the 1069 site of Zika virus open reading frame leading to a D  
72 (aspartic acid) to N (asparagine) in viral Envelope protein is responsible for the  
73 increased neurovirulence. These findings improve our understanding of the  
74 neurological pathogenesis of Zika virus and provide clues for the development  
75 of antiviral strategy.

76

77

78

79

80

81

82

83

84

85

86

87

## 88 **Introduction:**

89 Zika virus (ZIKV) is a reemerging arbovirus that has gained worldwide attention  
90 since its large outbreaks in Southern America and rapid spread to other  
91 continents during 2015-2016. The virus was first isolated in the Zika forest of  
92 Uganda in 1947, caused only a handful of documented self-limiting mild febrile  
93 illness during a period of sixty years, and thus had long been neglected as a  
94 human pathogen until causing major epidemics in Yap Island in 2007 (1),  
95 French Polynesia in 2013 (2,3), and Americas since 2014 (4). These recent  
96 large epidemics revealed some previously unappreciated facts that Zika virus  
97 infection is strongly associated with increased incidence of microcephaly in  
98 newborns, Guillain-Barré syndrome in adults, and persistent infection in male  
99 genital tissues and organs (4,5). Among these severe complications, the link  
100 between congenital Zika virus infection and birth defect or neurologic disorder  
101 in infants has made the strongest psychological impact on the public (6-11).

102

103 The long quiescent period followed by sudden major Zika outbreaks has been  
104 postulated to be the results of viral sequence mutations, increased competence  
105 of mosquito vector, and widely available susceptible populations (12). The  
106 interaction between Zika virus and its host has been an area of intensive study,  
107 in which specific links have been revealed, some of them emphasize the  
108 influences of viral genetics. An evolutionary Alanine to Valine (A188V) mutation  
109 on the NS1 protein of Zika virus increases virus infectivity in mosquitoes and  
110 also helps to evade interferon induction in murine cells *in vitro* and mouse  
111 model of infection *in vivo* (13,14). A Serine to Asparagine (S139N) mutation on  
112 the prM protein of Zika virus strains isolated between 2013-2014 has been  
113 associated with neurovirulence (15). By comparing functional differences  
114 between African and Asian Zika virus strains, however, it was found that the  
115 Asian strains responsible for the recent outbreaks and linked to microcephaly  
116 do not have more infectivity to neuronal cells in cell culture *in vitro* (16), or more

117 neurovirulence *in vivo* than the older African strains (17,18). Other studies have  
118 placed more emphasis on the global interactions between virus and host. It has  
119 been reported that high levels of virus RNA can persist in human fetal and  
120 neonatal central nervous system (CNS) *in vivo* (19,20), and experimentally  
121 infected fetal neurocytes *in vitro* (21). Preexisting anti-flavivirus immunity can  
122 worsen clinical outcomes, through antibody dependent enhancement (ADE) of  
123 Zika virus in murine models (22-24), but not in non-human primate models  
124 (25,26). Overall, the existing literature concurs that Zika virus infection can  
125 cause disorders in fetal and neonatal central nervous system, but reveals  
126 uncertainty on the specific virus genetic features resulting such disease  
127 outcomes.

128

129 To study these questions on Zika virus pathogenesis, various animal models  
130 have been developed, most of which use immune deficient mice that are  
131 susceptible to Zika virus infection *in vivo* such as A129 (129 background,  
132 deficient in IFN- $\alpha/\beta$  receptor), AG129 (129 background, deficient in IFN- $\alpha/\beta$  and  
133 IFN- $\gamma$  receptors), A6 (C57/BL6 background, deficient in IFN- $\alpha/\beta$  receptor), AG6  
134 (C57/BL6 background, deficient in IFN- $\alpha/\beta$  and IFN- $\gamma$  receptors); Stat2 deficient  
135 mice, and Rag1 deficient mice (13,27-30). Zika virus can also infect wild type  
136 neonatal mice and cause diseases that resemble to some extent microcephaly,  
137 paralysis, and seizure (31-33). Mechanistically, these neurological  
138 manifestations have been linked to Zika virus infection of neuron progenitor  
139 cells and other neurocytes in neonatal mice *in vivo* (11,17,34). Of note,  
140 comparative analysis between human and rodents has shown that mouse brain  
141 at postnatal day 1-2 roughly corresponds to the human fetal brain at mid-  
142 gestation stage (35,36). Therefore, newborn mice have also been used as a  
143 model for studying the influence of Zika virus infection on CNS development  
144 and pathogenesis.

145

146 Combining animal study and viral genetic analyses, here we report the isolation

147 and characterization of Zika virus variants accumulated during sequential *in*  
148 *vivo* passage of a clinical isolate of Zika virus (SZ-WIV01) in neonatal mice  
149 brain. Significantly, a viral variant with a single nonsynonymous nucleotide  
150 mutation on position 1069 of Zika virus open reading frame (ORF) (G1069A),  
151 causing an amino acid mutation (D67N) on the E protein, is sufficient to account  
152 for 100-1,000 fold increase in neurovirulence in neonatal mice. These data  
153 provide increased understanding of Zika pathogenesis.

154

155 **Results:**

156 ***In vivo* adaptation of a clinical Zika virus isolate SW01 in neonatal mice**

157 Zika virus SW01 (SZ-WIV01 strain) is a clinical isolate recovered in 2016 from  
158 a Chinese patient returned from an epidemic region, Samoa (37), expanded on  
159 C6/36 cells, titrated on Vero cells, and stored at -800C until use. To generate a  
160 mouse-adaptive viral strain, we serially passaged Zika virus SW01 in neonatal  
161 mice (Fig.1A). Two day post-neonatal (DP2) mice were injected with 1,000 PFU  
162 of virus by intracranial (i.c.) route. Brains of infected mice were collected from  
163 days 2 to 12 post infection, minced, filtered, and then used for measuring virus  
164 titer with standard plaque assay. *In vivo* virus growth kinetics results showed  
165 that Zika virus SW01 replicates to a peak level of  $10^6$  PFU/ml at day 8, and then  
166 gradually decline to around  $10^4$  PFU/ml at day 12 (Fig.1B). And thus the day 8  
167 viral stock was used to infect new DP2 neonatal mice from which viruses were  
168 harvested from mouse brain on day 8 and used to perform the next round of  
169 infection. After repeating this process for 11 rounds, we obtained a mouse  
170 adaptive virus of the SW01 strain, herein named MA-SW01(or MA-P11)  
171 (Fig.1C).

172

173 **MA-SW01 virus is more virulent than its parental virus in neonatal mice**

174 To characterize the mouse adapted Zika virus, 100 PFU of parental SW01 virus,  
175 mouse adapted MA-SW01 virus, or negative control sterile PBS were i.c.  
176 injected into newborn DP2 Balb/c mice and monitored for up to 25 days. All  
177 mice in the SW01 group showed a slow and moderate disease progression  
178 within 11-25 days (Fig.2A, 2C, 2D), in comparison, those in the MA-SW01  
179 group showed more rapid weight loss, severe morbidity, and even death within  
180 6-8 days (Fig.2B, 2C, 2D); indicating MA-SW01 is more virulent than SW01. To  
181 determine whether the above effects are viral specific, a dose-response  
182 experiment was performed. Different groups of DP2 Balb/c mice were i.c.  
183 inoculated with 0.1, 1, or 10 PFU of SW01 virus or mouse adapted MA-SW01



184 virus, or sterile PBS control, and then monitored for 25 days. Results showed  
185 that at 1 or 10 PFU of MA-SW01, 100% of mice died within 7-9 days; in contrast,  
186 1 PFU of SW01 was not lethal, and 10 PFU of SW01 only caused 77.8% fatality  
187 within a much longer period of 22-23 days. Even at 0.1 PFU, 62.5% mice in the  
188 MA-SW01 group died within 10-11 days post infection, and the remaining 37.5%  
189 survived for at least 25 days, which was the entire duration of observation; the  
190 same dose of 0.1 PFU of SW01 did not cause any death (**Fig.S1A**). These data  
191 demonstrated that MA-SW01 impacts on pathogenesis in a dose dependent  
192 manner.

193 To mimic natural Zika virus infection, 100 PFU of the parental SW01 virus or  
194 mouse adapted MA-SW01 virus was injected subcutaneously (s.c.) to DP2 and  
195 DP7 Balb/c mice and monitored for survival and body weight. Results showed  
196 that infection by SW01 virus was nonlethal to either DP2 or DP7 mice; in  
197 contrast, inoculation with the MA-SW01 virus caused 100% mortality in DP2  
198 mice within 6-8 days, and 25% death in DP7 mice at 15 days post infection  
199 (**Fig.S1B**). Together with previous results (**Fig.2C**), these data indicate that the  
200 virulence of MA-SW01 is age-dependent, but not related to the route of infection.

201 To examine whether the increased virulence of the mouse adapted MA-SW01  
202 virus is limited to only one specific mouse strain, we next injected s.c. to DP2  
203 C57/BL6 mice with either SW01 or MA-SW01 virus, or sterile PBS as control,  
204 and then monitored them for 15 days. Results showed that MA-SW01 infected  
205 C57/BL6 mice exhibited 100% mortality at 6-7 days post infection, whereas only  
206 44.4% of SW01 infected mice died at 15 days post infection (**Fig.S2**). Thus, the  
207 increased virulence of mouse adapted MA-SW01 virus is not restricted to one  
208 specific mouse strain.

209

### 210 **Increase virulence of MA-SW01 is associated with greater viral replication** 211 **in multiple organs including brain**

212 Previous studies have shown that a low-dose of Zika virus infection ( $2 \times 10^3$   
213 PFU) in C57/BL6 neonates led to a limited but detectable level of infection in

214 mouse brain, and a lower mortality rate than infection of immune deficient A6  
215 mice (IFN $\alpha$ / $\beta$ R<sup>-/-</sup>, C57/BL6 background) (31). In comparison, a high-dose of  
216 Zika virus infection (10<sup>6</sup> TCID<sub>50</sub>) in P1 neonatal C57/BL6 mice caused systemic  
217 infection and 100% death (32). To examine whether the MA-SW01 virus has  
218 adapted to replicate more efficiently in mice to cause systemic infection, and  
219 consequently increased virulence, DP2 Balb/c mice were infected s.c. with 100  
220 PFU of SW01 virus or MA-SW01 virus, and then the viral loads in tissues  
221 including brain, eyes, blood, spleen, and kidney were quantified by real time-  
222 qPCR at 3 and 6 days post infection. Results showed that higher level of Zika  
223 virus RNA was detected in the brain of MA-SW01 infected mice at 3 days post  
224 infection, and higher viral loads in multiple tissues (brain, eye, blood and spleen)  
225 were observed in MA-SW01 infected mice than SW01 infected mice at 6 days  
226 post infection (**Fig.3A**). Specifically, the average viral RNA level in the brain of  
227 MA-SW01 infected mice was about 15-fold and 488-fold higher than that of  
228 SW01 infected mice at 3 and 6 days post infection, respectively; in eyes, the  
229 average viral RNA level of MA-SW01 infected mice was 22-fold higher than that  
230 of SW01 infected mice at 6 days post infection; in spleen, the average viral RNA  
231 level of MA-SW01 infected mice exhibited approximately 5-fold increase  
232 compared to SW01 infected mice at 6 days after infection; in blood, the average  
233 viral RNA level of MA-SW01 infected mice was 54-fold higher than mice  
234 infected by SW01 virus at 6 days post infection(**Fig.3A**).

235 It is interesting to note that the average viral copy number in the brain of MA-  
236 SW01 infected mice was dramatically higher (about 488-fold) than that of SW01  
237 infected mice at day 6 post infection (**Fig.3A**). More viruses in the brain may be  
238 explained by two possibilities, one is that MA-SW01 virus replicates more  
239 efficiently than SW01 in the central nerve system (CNS); another is that MA-  
240 SW01 virus has increased neuro-invasion efficiency. To investigate these two  
241 possibilities, DP2 Balb/c mice were infected with 100 PFU SW01 virus or MA-  
242 SW01 virus by intracranial (i.c.) inoculation and viral RNA in the brains were  
243 quantified by real-time qPCR. Results showed that viral RNA of MA-SW01

244 group was not significantly different from that of SW01 group at 3 days post  
245 infection (**Fig.3B**), but 13.8 fold higher than that of SW01 group at 6 days post  
246 infection (**Fig.3C**), suggesting more efficient replication of MA-SW01 in the  
247 brain. Given that viral RNA level in the brain of MA-SW01 group was about 15  
248 fold higher than that of SW01 group at day 3, even with s.c. inoculation (**Fig.3A**),  
249 we deduced that the more virulent MA-SW01 virus has great penetration to  
250 brain. To more directly visualize viral infection in the brain, immunofluorescence  
251 staining of virus E protein in brain tissue sections was performed. Dramatically  
252 stronger fluorescent intensity indicating Zika virus E protein was detected in  
253 MA-SW01 infected mouse brains at 6 days post infection, compared to that  
254 in SW01 infected mice (**Fig.3D**). More detailed brain staining analyses showed  
255 that cortex and hippocampus regions are major sites for MA-SW01 infection  
256 (**Fig.S3A, S3B, and S3C**), albeit the specific target cells in these tissues are  
257 currently unclear. Collectively, the above data indicate that MA-SW01 virus also  
258 has increased tropism to neuronal tissues.

259

### 260 **The MA-SW01 virus has four high frequency nonsynonymous mutations**

261 To exploit whether the increased virulence of mouse adapted MA-SW01 virus  
262 is the result of unique genetic characteristics or quasispecies properties, we  
263 compared the MA-SW01 virus with its parental virus SW01 at the phenotypic  
264 and genetic levels. Biological clones derived from MA-SW01 virus (MA-1, MA-  
265 2, MA-3, MA-4, MA-5, MA-6, MA-7, MA-8, MA-9 and MA-10) were found to be  
266 more virulent than clones from SW01 (SW-1, SW-2, SW-3, and SW-4) (**Fig.S4**),  
267 indicating the increased virulence of MA-SW01 is not a reflection of viral  
268 quasispecies but may be related to specific genetic characteristics. To uncover  
269 the genetic changes during *in vivo* adaptation that might have caused the  
270 increased virus virulence, RNA was extracted from the original SW01 viral stock  
271 and mouse adapted MA-SW01 virus, and then subjected to sequencing by the  
272 next generation sequencing (NGS) method. Intrahost single nucleotide variant  
273 (iSNV) across the whole genome was analyzed by CLC genomic workbench.

274 Results showed 6 nucleotide substitutions (G1069A, G1074A, C1089T,  
275 A1330G, G3787A and T6036C) over 80% reads in the ORF (open reading  
276 frame) of mouse adapted MA-SW01 virus (**Fig.4A**). Among these substitutions,  
277 four were nonsynonymous mutations (G1069A, G1074A, A1330G and  
278 G3787A), and two were synonymous mutations (C1089T and T6036C); the four  
279 nonsynonymous mutations led to three amino acid changes on virus E protein  
280 (D67N, M68I, N154D), and one on NS2A protein (A117T) (**Fig.4B**). Of note,  
281 N154 is a unique glycosylation site on Zika virus E protein, and it has been  
282 shown to support Zika virus infection in adult immune-deficient mice by either  
283 enhancing virus neuroinvasion or facilitating DC-SIGN binding (38,39).  
284 However, when Zika virus was inoculated intracranially in neonatal mice, the  
285 deletion of N154 glycosylation had no impact on virus virulence (40).  
286 Collectively, these published data suggest that the N154D mutation may not be  
287 linked to the augmented infectivity and increased neurovirulence we have  
288 observed for the mouse adapted MA-SW01 virus. Hence, we focused on the  
289 other 3 amino acid mutations (D67N, M68I on E protein, and A117T on NS2A  
290 protein) for further study.

291

### 292 **Mutations on E protein are required for increased virulence**

293 Based on a widely used Zika virus infectious clone pFLZIKV (41), three mutant  
294 viruses (CM1, CM2 and CM3) were constructed: CM1 includes D67N and M68I  
295 mutations on E protein; CM2 includes the A117T mutation on NS2A protein;  
296 CM3 contains all three substitutions on E and NS2A proteins (**Fig.5A**). In BHK-  
297 21 cells, 1-3 days after transfection with *in vitro* transcribed RNA from these  
298 viral constructs, virus E protein expression was examined with a monoclonal  
299 antibody. Results showed that all three molecularly cloned mutant viruses were  
300 rescued and replicated efficiently (**Fig.5B**). These molecularly cloned mutant  
301 viruses (CM1, CM2, and CM3 virus) were then used to infect DP2 Balb/c mice  
302 i.c. at 10 PFU/mouse, using the parental molecularly cloned CAM-WT virus as  
303 a control, and then monitored for 25 days. Results showed that CM1 and CM3,

304 but not CM2, were more virulent than parental virus CAM-WT in neonatal mice  
305 (**Fig.5C**). Since both CM1 and CM3 contain 2 mutations on E protein (D67N,  
306 M68I), and CM2 only contains the single NS2A mutation, the above results  
307 suggest that the E protein mutations were determinants of increased virulence  
308 of MA-SW01, and the NS2A mutation was not. Therefore, CM1 virus containing  
309 two E protein mutations was chosen for further investigation.

310 We first examined whether the route of infection alters viral virulence. DP2  
311 Balb/c mice were infected s.c. with 100 PFU of control CAM-WT or test CM1  
312 virus, and then monitored for up to 25 days. Results showed that CM1 infection  
313 led to higher mortality than that of CAM-WT (**Fig.5D**). Although a difference was  
314 not observed earlier at 3 days post infection (**Fig.5E**), body weight recorded at  
315 11 days post infection showed that CM1 infected mice were significantly lighter  
316 than those infected by CAM-WT (**Fig.5F**). Notably, disease progression  
317 appeared to be reversible in the control CAM-WT group, but not so in the CM1  
318 group which had 100% mortality at 17 days post infection (**Fig.5G, 5H**). These  
319 data demonstrated that the severe outcome as a result of CM1 infection is not  
320 constrained by inoculation routes.

321 Since virulence of the mouse adapted MA-SW01 virus was not restricted to a  
322 single mouse strain, we sought to confirm that the molecularly cloned CM1 viurs  
323 follows the same principle. DP2 C57/BL6 mice were inoculated s.c. with 100  
324 PFU of parental CAM-WT or test CM1, or negative control PBS, and then  
325 monitored for 25 days. All mice (100%) infected by CM1 virus died at 11-13  
326 days post infection, whereas only 20% of those infected by CAM-WT  
327 succumbed at 25 days post infection (**Fig.S5**). These data demonstrated that  
328 the virulent phenotype of CM1 is not mouse strain specific.

329

### 330 **A D67N single mutation is sufficient to account for the increased virulence** 331 **of the molecularly cloned CM1 virus**

332 To determine which one of the two amino acids is more critical for a major  
333 change in viral phenotype, we first analyzed single nucleotide variants in E

334 protein sequence from serially passaged P1 (MA-P1) to P11 (MA-P11) viruses.  
335 Results revealed that there were progressive accumulations of D67N (from 22.7%  
336 to 99.4%), and M68I (from 3.0 % to 91.7%) mutations during the *in vivo* serial  
337 passage of parental SW01 virus. The baseline frequencies of these two  
338 mutations in the parental virus (P0, or SW01) were lower than 1%. Of note, the  
339 D67N maintained high mutation frequency (>90%) from P5 to P11 during *in vivo*  
340 passage (**Fig.6A**). Consistent with the notion that this mutation may be  
341 functionally significant, DP2 C57/BL6 mice infected with 100 PFU of MA-P5,  
342 MA-P8 or MA-P10 showed 100% mortality at 10 days post infection, whereas  
343 the parental virus SW01 infected mice had only 16.7% mortality at 15 days post  
344 infection (**Fig.6B**). Given that the D67N mutation rapidly increased to 92.4% in  
345 P5 virus (**Fig.6B**), and all single biological clones of the mouse adapted MA-  
346 SW01 virus contain the D67N mutation (**Table.S1**), it is reasonable to deduce  
347 that D67N mutation alone is responsible for the increased viral virulence. To  
348 test this idea, a molecular clone contains the single D67N mutation was  
349 constructed based on the CAM-WT backbone (pFLZIKV), and herein named  
350 CM1-A virus (**Fig.6C**), which was rescued successfully as showed by  
351 immunofluorescence staining of ZIKA VIRUS E protein of BHK-21 cells  
352 transfected with *in vitro* transcribed RNA from CAM-WT or CM1-A viruses  
353 (**Fig.6D**). Then, 100 PFU of CM1, CM1-A virus or PBS was inoculated s.c. into  
354 DP2 C57/BL6 mice which were then monitored for up to 25 days. Results  
355 showed that CM1-A was similar to CM1 in causing 100% mortality of infected  
356 mice at 12-13 days post infection (**Fig.6E**). These data demonstrated that a  
357 single D67N mutation is sufficient to account for the increased virulence of CM1.

358

### 359 **D67N mutation on E protein promotes Zika virus infection in brain**

360 To investigate whether viral E protein mutations ( D67N, M68I) influence tissue  
361 tropisms, DP2 Balb/c mice were infected s.c. with either parental CAM-WT or  
362 test CM1 (containing both D67N, M68I), then euthanized at 3 and 11 days post  
363 infection. Viral RNA in tissues were quantified by standard real-time qPCR. At



364 3 days post infection, all tissues except for eyes showed similar levels of viral  
365 RNA between CAM-WT and CM1 groups; at 11 days post infection, however,  
366 viral RNA of CM1 group was significantly higher than that of CAM-WT group in  
367 brains, eyes and blood, but not in spleens and kidneys (**Fig.7A**), confirming the  
368 combination of these E protein mutations affect tissue tropism.

369 The fact that more viral RNA was detected in brain and eyes, that are rich in  
370 nerve cells susceptible to Zika virus infection, implies that CM1 virus has growth  
371 advantage over CAM-WT in these cells. To directly test this notion, DP2 Balb/c  
372 mice were infected i.c. with CAM-WT or CM1, and then monitored for virus  
373 burden by real-time qPCR. Results showed that brain viral loads of CM1 group  
374 was higher than that of CAM-WT group at 11 days post infection, but not 3 days  
375 post infection (**Fig.7C, 7D**), suggesting that CM1 has growth advantage over  
376 CAM-WT in brain.

377 To further dissect whether single D67N mutation in E protein plays the essential  
378 role of altering viral virulence and tissue tropism, we next used CM1-A virus  
379 (containing only D67N ) to perform viral infection experiments. Results showed  
380 that irrespective of through s.c. infection (**Fig.7B**), or i.c. infection (**Fig.7C, 7D**),  
381 viral load in brains of CM1-A group were always higher than that of CAM-WT  
382 group at 11 days post infection, but not at 3 days post infection. Collectively,  
383 these data indicated that D67N mutation promotes virus virulence partially  
384 through enhancing virus replication in CNS.

385

### 386 **Rapid D67N accumulation may have increased virus fitness**

387 To confirm that the observed dominant D67N substitution in the *in vivo* adapted  
388 MA-SW01 virus is originated from the parental clinical isolate SW01 virus,  
389 instead of an artifact resulted from an extraneous *in vitro* cell culture selection  
390 process, we analyzed the nucleotide polymorphism at the 1069 position of Zika  
391 virus SW01 open reading frame (ORF), which corresponds to amino acid  
392 sequence at the 67 position of E protein. Results showed that 1069A variant of  
393 ORF was present in the initial SW01 stock at a low frequency of 0.055%

394 (**Table.1**), indicating a minority of viral quasispecies features the N67 on its E  
395 protein. Together with previous data (**Fig.6A, 6B**), it is reasonable to deduce  
396 that D67N substitution provides more viral fitness in CNS, and thus enables  
397 MA-SW01 to outgrow other viral variants within the SW01 quasispecies.

398

399



400 **Discussion:**

401 The pathogenesis of neurological disorders in association with Zika virus  
402 infection has been an area of intensive investigation recently. The scientific  
403 progress, however, has been hampered in part by the lack of robust *in vivo*  
404 experimental models to study the cause-and-effect between Zika virus infection  
405 and various clinical outcomes. To this end, we have generated a mouse  
406 adapted Zika virus (MA-SW01) strain that showed 100-1,000 fold increased  
407 virulence than its parental virus clinical isolate SW01, with corresponding  
408 increase in neurotropism, by serially passage of SW01 in the brains of neonatal  
409 mice. NGS analyses revealed that the MA-SW01 virus has four dominant  
410 nonsynonymous nucleotide mutations on genes encoding E protein (3  
411 mutations) and NS2A protein (1 mutation). Mechanistic studies using  
412 molecularly cloned Zika virus variants contain these mutations either alone or in  
413 combination demonstrate that a single nucleotide G1069A mutation in Zika virus  
414 ORF that causes an amino acid change (D67N) on the E protein is sufficient to  
415 confer greater viral replication in mouse brain and much increased mortality.  
416 These results not only establish an *in vivo* model by which many facets of Zika  
417 virus pathogenesis could be further studied, but also provide a tangible viral  
418 genetic basis to explain the neurological complications observed in association  
419 with Zika virus infection.

420

421 Identifying viral genetic features that may affect the outcomes of viral infections  
422 is an area of significant interest. Zika viruses with mutations on prM, NS1, NS2A  
423 have been reported to profoundly change viral infectivity in mosquitoes, cell  
424 lines, and mice (13,15,30). In the current study, we demonstrated for the first  
425 time that a single mutation on E protein can markedly increase the  
426 neurovirulence of Zika virus.

427

428 The specific mechanisms that explain why a single D67N mutation on E protein

429 can dramatically change Zika virus infectivity is currently unknown. One reason  
430 may be its potential link to glycosylation. In all four DENV serotypes, there are  
431 two highly conserved N-linked glycosylation sites on E protein, N67 and N153,  
432 that play critical role for viral entry (42). However, similar to West Nile virus  
433 (WNV) and Japanese encephalitis virus (JEV), Zika virus has only one N154  
434 glycosylation site on E protein (40,43). Indeed, glycosylation on N153 or N154  
435 of E protein helps WNV or JEV to invade CNS in mammals (38,39,44,45).  
436 Surprisingly, an additional use of N67 glycosylation on JEV attenuates virus  
437 pathogenesis and reduces viral neuro-invasion *in vivo* (45), despite the N67  
438 glycosylation mediates enhanced infectivity of WNV or DENV by facilitating  
439 interaction with DC-SIGN molecule on cell surface in cell culture models (45-  
440 47). The influence of un-glycosylated N67 on viral pathogenesis is unknown,  
441 despite of the existence of this form of N67 on a number of flaviviruses (48).  
442 Because the mouse adapted MA-SW01 virus has a mutation on the N154 site  
443 and unable to acquire glycosylation through this site, it is tempting to suggest  
444 that the D67N is a functional compensatory mutation. It would be interesting to  
445 test whether MA-SW01 is glycosylated at the 67 site in future studies.

446

447 Other than mechanistically interesting, our findings may have practical  
448 implications as well. The amino acid D67 on E protein is conserved among  
449 many known Zika virus strains, and it forms a recognition site for several  
450 monoclonal antibodies (mAbs) isolated from Zika virus infected patients; some  
451 of these mAbs can prevent Zika virus infection in animal models (49-52),  
452 indicating the 67 site being functionally important. It would be interesting to test  
453 in future studies whether our mouse adapted virus that has a D67N mutation  
454 can escape these antibodies, and thereby become more virulent. With respect  
455 to the N154 glycosylation site, our data are different from a recent study which  
456 showed that an artificial deletion of N154 glycosylation of Zika virus E protein  
457 decreases viral infectivity and neuroinvasion in mice, while maintaining viral  
458 immunogenicity *in vivo*, and thus being a promising strategy for making live

459 attenuated vaccine (40). We found that mouse adapted Zika virus clone (MA-  
460 SW01) without the N154 glycosylation site on E protein is still highly virulent,  
461 even more so than viruses cloned from the parental SW01 virus which contains  
462 an intact N154 glycosylation site on E protein. Therefore, the vaccine strategy  
463 utilizing a deletion of N154 glycosylation may only apply to some viral variants,  
464 but not others.

465

466 In conclusion, we have identified a single amino acid D67N mutation on the  
467 putative glycosylation site of E protein of Zika virus, and demonstrated the  
468 mutant virus having profoundly increased viral virulence and neurotropism in  
469 mice. Close monitoring and large-scale screening of this unique viral variant in  
470 humans should provide clue to understand some major questions in the field,  
471 such as the sudden outbreak of Zika disease in certain locale, and the  
472 association between Zika virus infection and neurological disorders.

473

## 474 **Materials and methods**

475

### 476 **Ethic statement:**

477 All experiments were performed strictly in accordance with the guidelines of  
478 care and use of laboratory animals by the Ministry of Science and Technology  
479 of the People's Republic of China and regulations of biosafety level 2 (BSL-2)  
480 and animal biosafety level-2 (A-BSL-2) containment facilities at Institut Pasteur  
481 of Shanghai. The animal protocols were approved by the biosafety laboratory  
482 and the institutional Animal Care and Use Committee at Institut Pasteur of  
483 Shanghai (Approval number: A2018027). All mice used in this study were  
484 carefully fed and suffering of animals was minimized.

485

### 486 **Mouse experiments:**

487 Balb/c and C57BL/6 mice (B6) were purchased (Vital River Laboratory Animal  
488 Technology Co., Ltd, Beijing) and bred for experiments under specific pathogen  
489 free (SPF) conditions at the BSL2 Animal Core facility (A-BSL-2) at Institut  
490 Pasteur of Shanghai . Balb/c and C57BL/6 pregnant mice were housed  
491 separately before being delivered to the BSL-2 laboratory. DP2 (2 days post-  
492 delivery) and DP7 (7 days post-delivery) offspring mice were infected with  
493 indicated Zika virus strain through subcutaneous (s.c.) or intracranial (i.c.)  
494 injection. Body weight, survival rate and clinical score were monitored daily  
495 according to experimental design.

496

### 497 **Cell lines and viruses:**

498 Vero-E6 and BHK-21 cells were grown at 37°C in Dulbecco's Modified Eagle  
499 Medium (DMEM) (Gibco, USA) supplemented with 10% fetal bovine serum  
500 (FBS) (Gibco, USA) and 1% penicillin and streptomycin (P/S). Mosquito C6/36  
501 cells were cultured in Modified Eagle Medium (MEM) (Gibco, USA) with 10%  
502 FBS, 1% P/S and 1% non-essential amino acids (NEAA). Zika virus clinical

503 isolate SW01 (also known as SZ-WIV01, GenBank: MH055376.1) was kindly  
504 provided by Wuhan Institute of Virology, Chinese Academy of Sciences. SW01  
505 was propagated once in C6/36 cells with MEM (Gibico) plus 2% FBS, 1%  
506 Penicillin-Streptomycin and 1% non-essential amino acids. Rescued virus  
507 mutates with the backbone of Zika virus CAM-2010 infectious clone were  
508 passaged once in C6/36 cells. All amplified viruses were aliquot into 2ml vials  
509 and stocked at -80°C until use.

510

#### 511 **Virus titration:**

512 Virus titer was determined by titration on Vero-E6 monolayer. Briefly, Vero-E6  
513 cells were seeded on 24 well plate ( $1-1.2 \times 10^5$  cells/well) one day prior to  
514 infection, and washed once next day with DMEM without FBS. Virus was 10-  
515 fold serially diluted, then 200 $\mu$ l of virus was added to the Vero cell  
516 monolayer,( followed by incubation at 37°C for 2 hours.The supernatant  
517 containing virus was replaced by 1.2ml DMEM with 1.5% FBS, 1% CMC  
518 (carboxymethylcellulose), then incubated at 37°C, 5%CO<sub>2</sub> for 96 hours. Four  
519 days later, the overlay was removed and cells were fixed with 4% PFA for 30min.  
520 The viral plaque was visualized and calculated after being stained by 0.25%  
521 crystal violet.

522

#### 523 **Adaptation of SW01 *in vivo***

524 Zika virus clinical isolate SW01( $10^3$  PFU/10 $\mu$ l) was injected into the brain  $\lambda$  point  
525 of Balb/c DP2 neonatal mice. At the indicated time (1-12 days and 8 days) post  
526 infection, mice were anaesthetized and brains were collected and homogenized  
527 in 1ml sterile PBS. Then, the homogenized suspension was centrifuged to  
528 collect supernatant, which was aliquot for viral titration and stored at -80°C. A  
529 new round of *in vivo* infection into the mouse brain was performed after viral  
530 titration.

531

#### 532 **Determination of virus burden in tissues:**

533 At the indicated time (3, 6 and 11 days post infection), Zika virus infected mice  
534 were euthanized and tissues were collected, fixed with Trizol (Invitrogen, USA)  
535 reagent. RNA was extracted according to the manufactures' manual, then  
536 aliquot and stored at -80°C before use. RNA concentration was determined  
537 by Nanodrop 2000 (Thermo fisher, USA). Reverse transcription with ZIKA virus  
538 specific primer (Rev-AAGTGATCCATGTGATCAGTTGATCC) was performed  
539 using FastQuant RT Kit (Tiangen). Real-time PCR was done on 7900HT (ABI)  
540 machine using Fast Fire qPCR Premix (Probe) (Tiangen). Virus RNA copies  
541 were calculated with a standard curve established with NS1 gene transcript.  
542 The primers are as follows: (For: CAACCACAGC- AAGCGGAAG, Rev:  
543 AAGTGATCCATGTGATCAGTTGATCC, Probe: 5'-FAM/TGGTATGGAATGGA  
544 GATAAGGC/MGB-3').

545

#### 546 **Immunostaining of brain sections:**

547 Dissected brains were immediately immersed in 4% paraformaldehyde (PFA)  
548 and fixed for 24 hours. Then the fixed tissues were embedded into paraffin  
549 according to a standard protocol. Embedded brains were sectioned into 4 µm  
550 slices using Leica RM2016. After being deparaffinized with xylene and ethanol,  
551 rehydrated with ethanol and H<sub>2</sub>O, sections were blocked in blocking buffer (3%  
552 BSA-PBS) for 30 min, then incubated with primary antibody targeting Zika virus  
553 envelope protein (1:1000 diluted in blocking buffer; cat.no: BF-1176-56;  
554 BioFront) overnight at 4°C. On day 2, the sections were incubated in  
555 fluorescence labelled secondary antibody (1:400, GB25301, Servicebio) at RT  
556 for 1 hour. Nucleus were stained with DAPI (G1012, Servicebio) at RT for 10  
557 min. Original images were captured and visualized using a Nikon Eclipse C1  
558 Ortho-Fluorescent microscope with Nikon DS-U3 image system. All  
559 immunofluorescent images were analyzed with the Panoramic Viewer  
560 (3DHISTECH), ImageJ, and GraphPad V8 software.

561

#### 562 **Single clone selection and E protein sequencing:**

563 Stocks of SW01 and MA-SW01 virus were serially diluted and seeded on Vero  
564 monolayer in 24 well plate. Four days post infection, the supernatants from  
565 wells containing single virus plaque were collected and amplified in C6/36 cells  
566 once, and viral titer was determined by standard plaque assay. For E protein  
567 sequencing, RNA of single virus clone was extracted by Viral RNA Mini Kit  
568 (QIAGEN) and reversely transcribed using PrimeScript™ II 1st Strand cDNA  
569 Synthesis Kit (TaKaRa) with virus envelope protein gene specific primer (Env-  
570 Rev primer: CGGGATCCCGAGCAGAGACGGCTGTGGATAAG). Virus E gene  
571 was amplified by PCR (Env-For primer: CGAAGCTTATGATCAGGTGCATAGG  
572 AGTCAGCA, Env-Rev primer: CGGGATCCCGAGCAGAGACGGCTGTGGAT  
573 AAG), then cloned into pEASY-Blunt Cloning Kit (Transgen) and sequenced by  
574 Sanger method.

575

#### 576 **Next generation sequencing (NGS) of ZIKA virus:**

577 Briefly, virus stocks were filtered through a 0.45 µm filter before nucleic acid  
578 extraction. Virus RNA was extracted from 400 µl of filtered supernatant with the  
579 High Pure Viral RNA Kit (Roche). The sequencing library was constructed using  
580 Ion Total RNA-Seq Kit v2 (Thermo Fisher Scientific) and sequenced on an Ion  
581 S5 sequencer (Thermo Fisher Scientific). Low quality reads and short reads  
582 were filtered. All filtered reads were assembled by mapping to the reference  
583 sequence MH055376 using CLC Genomic Workbench (ver 9.0). The mutation  
584 site was manually checked with original sequencing data. iSNV and Graphing  
585 were performed on CLC Genomic Workbench and Origin. NGS raw data were  
586 available at Sequence Read Archive (SRA) of NCBI (Access number:  
587 SRP237251).

588

#### 589 **Generation of Zika virus mutants:**

590 The infectious cDNA clone (pFLZIKV) containing Zika virus CAM-2010 full-  
591 length genome were used as the backbone for introducing the nucleotides  
592 substitutions into envelope protein (D67N, M68I) or NS2A protein (A117T),



593 singly or combined, using the Q5 site directed mutagenesis kit (NEB). All the  
594 mutations were confirmed by DNA sequencing. The full-length infectious clones  
595 were rescued as described previously (41).

596

#### 597 **Indirect immunofluorescence assay (IFA):**

598 The viral RNA was transfected into BHK-21 cells using Lipofectamine 3000  
599 reagent (Thermo Fisher Scientific) according to the manufacturer's instructions.  
600 At 24, 48, and 72 hr post infection, the infected cells were fixed in  
601 acetone/methanol (V/V=3/7) at -20 °C for 15 min, and then used for detection  
602 of Zika virus E protein expression by IFA as described previously (53).

603

#### 604 **Statistic analysis:**

605 Survival curves were analyzed by log rank test. Body weight was analyzed by  
606 Two-way ANOVA (Turkey correction). All summarized data were compared for  
607 statistical differences by student's t test or two-way-ANOVA. All analyses were  
608 performed on Graphpad Prism V8.0 platform. Statistical significance levels  
609 were reported as the following: "\*" for  $p < 0.05$ ; "\*\*" for  $p < 0.01$ ; "\*\*\*" for  $p <$   
610  $0.001$  or less.

611

#### 612 **Acknowledgement**

613 We thank Dr. C.Y Zhang (Institut Pasteur of Shanghai, Shanghai, China) for  
614 kindly providing information on primers and RNA standard used for Real-time  
615 PCR assay of ZIKA virus. The study was supported in part by the following  
616 grants: Strategic Priority Research Program of the Chinese Academy of  
617 Sciences (XDB29040301, X.J.), National Key R & D Program of China  
618 (2016YFC1201000, X.J.), Ministry of Science and Technology of China  
619 (2016YFE0133500, X.J.), European Union Horizon 2020 Research and  
620 Innovation Programme under ZIKAlliance Grant Agreement 734548 (X.J.).

621



622

## 623 **Author Contributions**

624 X.J. supervised the research; X.J., ZH.L. conceived the research; ZH.L., YW.Z.,  
625 ML.C., YG.T., CF.Q., X.J. contributed to the project design and results  
626 discussion; ZH.L., YW.Z., ML.C., NN.G. and JY.S. performed the experiments  
627 and analyzed the experimental data; ZH.L. and YW.Z. analyzed and  
628 summarized the NGS data. ZH.L. wrote the original manuscript. ZH.L., YW.Z.,  
629 ML.C., YG.T., CF.Q. and X.J. revised and edited the manuscript.

630

## 631 **Reference:**

- 632 1. Duffy, M.R., Chen, T.-H., Hancock, W.T., Powers, A.M., Kool, J.L., Lanciotti, R.S., Pretrick, M.,  
633 Marfel, M., Holzbauer, S., Dubray, C. *et al.* (2009) Zika Virus Outbreak on Yap Island, Federated  
634 States of Micronesia. *New England Journal of Medicine*, **360**, 2536-2543.
- 635 2. Van-Mai Cao-Lormeau, Claudine Roche, A.T., Emilie Robin, A.-L.B., Henri-Pierre Mallet, Amadou  
636 Alpha Sall and Musso, a.D. (2014) Zika Virus, French Polynesia, South Pacific, 2013. *Emerging*  
637 *Infectious Diseases*, **20**, 3.
- 638 3. Jouannic, J.-M., Friszer, S., Leparc-Goffart, I., Garel, C. and Eyrolle-Guignot, D. (2016) Zika virus  
639 infection in French Polynesia. *The Lancet*, **387**, 1051-1052.
- 640 4. Pierson, T.C. and Diamond, M.S. (2018) The emergence of Zika virus and its new clinical  
641 syndromes. *Nature*, **560**, 573-581.
- 642 5. Baud, D., Gubler, D.J., Schaub, B., Lanteri, M.C. and Musso, D. (2017) An update on Zika virus  
643 infection. *The Lancet*, **390**, 2099-2109.
- 644 6. Driggers, R.W., Ho, C.Y., Korhonen, E.M., Kuivanen, S., Jaaskelainen, A.J., Smura, T., Rosenberg,  
645 A., Hill, D.A., DeBiasi, R.L., Vezina, G. *et al.* (2016) Zika Virus Infection with Prolonged Maternal  
646 Viremia and Fetal Brain Abnormalities. *The New England journal of medicine*, **374**, 2142-2151.
- 647 7. Miner, J.J., Cao, B., Govero, J., Smith, A.M., Fernandez, E., Cabrera, O.H., Garber, C., Noll, M.,  
648 Klein, R.S., Noguchi, K.K. *et al.* (2016) Zika Virus Infection during Pregnancy in Mice Causes  
649 Placental Damage and Fetal Demise. *Cell*, **165**, 1081-1091.
- 650 8. Mlakar, J., Korva, M., Tul, N., Popovic, M., Poljsak-Prijatelj, M., Mraz, J., Kolenc, M., Resman Rus,  
651 K., Vesnaver Vipotnik, T., Fabjan Vodusek, V. *et al.* (2016) Zika Virus Associated with  
652 Microcephaly. *The New England journal of medicine*, **374**, 951-958.
- 653 9. Yockey, L.J., Varela, L., Rakib, T., Khoury-Hanold, W., Fink, S.L., Stutz, B., Szigeti-Buck, K., Van  
654 den Pol, A., Lindenbach, B.D., Horvath, T.L. *et al.* (2016) Vaginal Exposure to Zika Virus during  
655 Pregnancy Leads to Fetal Brain Infection. *Cell*, **166**, 1247-1256 e1244.
- 656 10. Nielsen-Saines, K., Brasil, P., Kerin, T., Vasconcelos, Z., Gabaglia, C.R., Damasceno, L., Pone, M.,  
657 Abreu de Carvalho, L.M., Pone, S.M., Zin, A.A. *et al.* (2019) Delayed childhood  
658 neurodevelopment and neurosensory alterations in the second year of life in a prospective  
659 cohort of ZIKV-exposed children. *Nature medicine*, **25**, 1213-1217.

- 660 11. Li, C., Xu, D., Ye, Q., Hong, S., Jiang, Y., Liu, X., Zhang, N., Shi, L., Qin, C.F. and Xu, Z. (2016) Zika  
661 Virus Disrupts Neural Progenitor Development and Leads to Microcephaly in Mice. *Cell stem*  
662 *cell*, **19**, 120-126.
- 663 12. Musso, D., Ko, A.I. and Baud, D. (2019) Zika Virus Infection - After the Pandemic. *The New*  
664 *England journal of medicine*, **381**, 1444-1457.
- 665 13. Liu, Y., Liu, J., Du, S., Shan, C., Nie, K., Zhang, R., Li, X.F., Zhang, R., Wang, T., Qin, C.F. *et al.* (2017)  
666 Evolutionary enhancement of Zika virus infectivity in *Aedes aegypti* mosquitoes. *Nature*, **545**,  
667 482-486.
- 668 14. Xia, H., Luo, H., Shan, C., Muruato, A.E., Nunes, B.T.D., Medeiros, D.B.A., Zou, J., Xie, X., Giraldo,  
669 M.I., Vasconcelos, P.F.C. *et al.* (2018) An evolutionary NS1 mutation enhances Zika virus evasion  
670 of host interferon induction. *Nature communications*, **9**, 414.
- 671 15. Yuan, L., Huang, X.-Y., Liu, Z.-Y., Zhang, F., Zhu, X.-L., Yu, J.-Y., Ji, X., Xu, Y.-P., Li, G., Li, C. *et al.*  
672 (2017) A single mutation in the prM protein of Zika virus contributes to fetal microcephaly.  
673 *Science*, **358**, 933-936.
- 674 16. Simonin, Y., Loustalot, F., Desmetz, C., Foulongne, V., Constant, O., Fournier-Wirth, C., Leon, F.,  
675 Moles, J.P., Goubaud, A., Lemaitre, J.M. *et al.* (2016) Zika Virus Strains Potentially Display  
676 Different Infectious Profiles in Human Neural Cells. *EBioMedicine*, **12**, 161-169.
- 677 17. Shao, Q., Herrlinger, S., Zhu, Y.N., Yang, M., Goodfellow, F., Stice, S.L., Qi, X.P., Brindley, M.A.  
678 and Chen, J.F. (2017) The African Zika virus MR-766 is more virulent and causes more severe  
679 brain damage than current Asian lineage and dengue virus. *Development*, **144**, 4114-4124.
- 680 18. Udenze, D., Trus, I., Berube, N., Gerds, V. and Karniyuchuk, U. (2019) The African strain of Zika  
681 virus causes more severe in utero infection than Asian strain in a porcine fetal transmission  
682 model. *Emerging microbes & infections*, **8**, 1098-1107.
- 683 19. Bhatnagar, J., Rabeneck, D.B., Martines, R.B., Reagan-Steiner, S., Ermias, Y., Estetter, L.B., Suzuki,  
684 T., Ritter, J., Keating, M.K., Hale, G. *et al.* (2017) Zika Virus RNA Replication and Persistence in  
685 Brain and Placental Tissue. *Emerg Infect Dis*, **23**, 405-414.
- 686 20. Brito, C.A.A., Henriques-Souza, A., Soares, C.R.P., Castanha, P.M.S., Machado, L.C., Pereira, M.R.,  
687 Sobral, M.C.M., Lucena-Araujo, A.R., Wallau, G.L. and Franca, R.F.O. (2018) Persistent detection  
688 of Zika virus RNA from an infant with severe microcephaly - a case report. *BMC infectious*  
689 *diseases*, **18**, 388.
- 690 21. Hanners, N.W., Eitson, J.L., Usui, N., Richardson, R.B., Wexler, E.M., Konopka, G. and Schoggins,  
691 J.W. (2016) Western Zika Virus in Human Fetal Neural Progenitors Persists Long Term with  
692 Partial Cytopathic and Limited Immunogenic Effects. *Cell reports*, **15**, 2315-2322.
- 693 22. Bardina, S.V., Bunduc, P., Tripathi, S., Duehr, J., Frere, J.J., Brown, J.A., Nachbagauer, R., Foster,  
694 G.A., Krysztof, D., Tortorella, D. *et al.* (2017) Enhancement of Zika virus pathogenesis by  
695 preexisting ant flavivirus immunity. *Science*, **356**, 175-180.
- 696 23. Brown, J.A., Singh, G., Acklin, J.A., Lee, S., Duehr, J.E., Chokola, A.N., Frere, J.J., Hoffman, K.W.,  
697 Foster, G.A., Krysztof, D. *et al.* (2019) Dengue Virus Immunity Increases Zika Virus-Induced  
698 Damage during Pregnancy. *Immunity*, **50**, 751-762 e755.
- 699 24. Rathore, A.P.S., Saron, W.A.A., Lim, T., Jahan, N. and St. John, A.L. (2019) Maternal immunity  
700 and antibodies to dengue virus promote infection and Zika virus-induced microcephaly in  
701 fetuses. *Science Advances*, **5**, eaav3208.
- 702 25. McCracken, M.K., Gromowski, G.D., Friberg, H.L., Lin, X., Abbink, P., De La Barrera, R., Eckles,  
703 K.H., Garver, L.S., Boyd, M., Jetton, D. *et al.* (2017) Impact of prior flavivirus immunity on Zika

- 704 virus infection in rhesus macaques. *PLoS pathogens*, **13**, e1006487.
- 705 26. Pantoja, P., Perez-Guzman, E.X., Rodriguez, I.V., White, L.J., Gonzalez, O., Serrano, C., Giavedoni,  
706 L., Hodara, V., Cruz, L., Arana, T. *et al.* (2017) Zika virus pathogenesis in rhesus macaques is  
707 unaffected by pre-existing immunity to dengue virus. *Nature communications*, **8**, 15674.
- 708 27. Rossi, S.L., Tesh, R.B., Azar, S.R., Muruato, A.E., Hanley, K.A., Auguste, A.J., Langsjoen, R.M.,  
709 Paessler, S., Vasilakis, N. and Weaver, S.C. (2016) Characterization of a Novel Murine Model to  
710 Study Zika Virus. *The American journal of tropical medicine and hygiene*, **94**, 1362-1369.
- 711 28. Dowall, S.D., Graham, V.A., Rayner, E., Atkinson, B., Hall, G., Watson, R.J., Bosworth, A., Bonney,  
712 L.C., Kitchen, S. and Hewson, R. (2016) A Susceptible Mouse Model for Zika Virus Infection.  
713 *PLoS neglected tropical diseases*, **10**, e0004658.
- 714 29. Lazear, H.M., Govero, J., Smith, A.M., Platt, D.J., Fernandez, E., Miner, J.J. and Diamond, M.S.  
715 (2016) A Mouse Model of Zika Virus Pathogenesis. *Cell host & microbe*, **19**, 720-730.
- 716 30. Gorman, M.J., Caine, E.A., Zaitsev, K., Begley, M.C., Weger-Lucarelli, J., Uccellini, M.B., Tripathi,  
717 S., Morrison, J., Yount, B.L., Dinnon, K.H., 3rd *et al.* (2018) An Immunocompetent Mouse Model  
718 of Zika Virus Infection. *Cell host & microbe*, **23**, 672-685 e676.
- 719 31. Manangeeswaran, M., Ireland, D.D. and Verthelyi, D. (2016) Zika (PRVABC59) Infection Is  
720 Associated with T cell Infiltration and Neurodegeneration in CNS of Immunocompetent  
721 Neonatal C57Bl/6 Mice. *PLoS pathogens*, **12**, e1006004.
- 722 32. Li, S., Armstrong, N., Zhao, H., Hou, W., Liu, J., Chen, C., Wan, J., Wang, W., Zhong, C., Liu, C. *et*  
723 *al.* (2018) Zika Virus Fatally Infects Wild Type Neonatal Mice and Replicates in Central Nervous  
724 System. *Viruses*, **10**.
- 725 33. Nem de Oliveira Souza, I., Frost, P.S., França, J.V., Nascimento-Viana, J.B., Neris, R.L.S., Freitas,  
726 L., Pinheiro, D.J.L.L., Nogueira, C.O., Neves, G., Chimelli, L. *et al.* (2018) Acute and chronic  
727 neurological consequences of early-life Zika virus infection in mice. *Science Translational*  
728 *Medicine*, **10**, eaar2749.
- 729 34. Zhang, F., Wang, H.J., Wang, Q., Liu, Z.Y., Yuan, L., Huang, X.Y., Li, G., Ye, Q., Yang, H., Shi, L. *et*  
730 *al.* (2017) American Strain of Zika Virus Causes More Severe Microcephaly Than an Old Asian  
731 Strain in Neonatal Mice. *EBioMedicine*, **25**, 95-105.
- 732 35. Semple, B.D., Blomgren, K., Gimlin, K., Ferriero, D.M. and Noble-Haeusslein, L.J. (2013) Brain  
733 development in rodents and humans: Identifying benchmarks of maturation and vulnerability  
734 to injury across species. *Progress in neurobiology*, **106-107**, 1-16.
- 735 36. Auvin, S. and Pressler, R. (2013) Comparison of Brain Maturation among Species: An Example  
736 in Translational Research Suggesting the Possible Use of Bumetanide in Newborn. *Frontiers in*  
737 *Neurology*, **4**.
- 738 37. Deng, C., Liu, S., Zhang, Q., Xu, M., Zhang, H., Gu, D., Shi, L., He, J.a., Xiao, G. and Zhang, B.  
739 (2016) Isolation and characterization of Zika virus imported to China using C6/36 mosquito  
740 cells. *Virologica Sinica*, **31**, 176-179.
- 741 38. Annamalai, A.S., Pattnaik, A., Sahoo, B.R., Muthukrishnan, E., Natarajan, S.K., Steffen, D., Vu,  
742 H.L.X., Delhon, G., Osorio, F.A., Petro, T.M. *et al.* (2017) Zika Virus Encoding Nonglycosylated  
743 Envelope Protein Is Attenuated and Defective in Neuroinvasion. *Journal of Virology*, **91**,  
744 e01348-01317.
- 745 39. Carbaugh, D.L., Baric, R.S. and Lazear, H.M. (2019) Envelope Protein Glycosylation Mediates  
746 Zika Virus Pathogenesis. *Journal of Virology*, **93**, e00113-00119.
- 747 40. Fontes-Garfias, C.R., Shan, C., Luo, H., Muruato, A.E., Medeiros, D.B.A., Mays, E., Xie, X., Zou,

- 748 J., Roundy, C.M., Wakamiya, M. *et al.* (2017) Functional Analysis of Glycosylation of Zika Virus  
749 Envelope Protein. *Cell reports*, **21**, 1180-1190.
- 750 41. Shan, C., Xie, X., Muruato, A.E., Rossi, S.L., Roundy, C.M., Azar, S.R., Yang, Y., Tesh, R.B., Bourne,  
751 N., Barrett, A.D. *et al.* (2016) An Infectious cDNA Clone of Zika Virus to Study Viral Virulence,  
752 Mosquito Transmission, and Antiviral Inhibitors. *Cell host & microbe*, **19**, 891-900.
- 753 42. Rey, F.A. (2003) Dengue virus envelope glycoprotein structure: new insight into its interactions  
754 during viral entry. *Proceedings of the National Academy of Sciences of the United States of*  
755 *America*, **100**, 6899-6901.
- 756 43. Hasan, S.S., Sevvana, M., Kuhn, R.J. and Rossmann, M.G. (2018) Structural biology of Zika virus  
757 and other flaviviruses. *Nature structural & molecular biology*, **25**, 13-20.
- 758 44. Beasley, D.W., Whiteman, M.C., Zhang, S., Huang, C.Y., Schneider, B.S., Smith, D.R., Gromowski,  
759 G.D., Higgs, S., Kinney, R.M. and Barrett, A.D. (2005) Envelope protein glycosylation status  
760 influences mouse neuroinvasion phenotype of genetic lineage 1 West Nile virus strains. *J Virol*,  
761 **79**, 8339-8347.
- 762 45. Liang, J.J., Chou, M.W. and Lin, Y.L. (2018) DC-SIGN Binding Contributed by an Extra N-Linked  
763 Glycosylation on Japanese Encephalitis Virus Envelope Protein Reduces the Ability of Viral Brain  
764 Invasion. *Frontiers in cellular and infection microbiology*, **8**, 239.
- 765 46. Davis, C.W., Mattei, L.M., Nguyen, H.Y., Ansarah-Sobrinho, C., Doms, R.W. and Pierson, T.C.  
766 (2006) The location of asparagine-linked glycans on West Nile virions controls their interactions  
767 with CD209 (dendritic cell-specific ICAM-3 grabbing nonintegrin). *The Journal of biological*  
768 *chemistry*, **281**, 37183-37194.
- 769 47. Pokidysheva, E., Zhang, Y., Battisti, A.J., Bator-Kelly, C.M., Chipman, P.R., Xiao, C., Gregorio, G.G.,  
770 Hendrickson, W.A., Kuhn, R.J. and Rossmann, M.G. (2006) Cryo-EM reconstruction of dengue  
771 virus in complex with the carbohydrate recognition domain of DC-SIGN. *Cell*, **124**, 485-493.
- 772 48. Barker, W.C., Mazumder, R., Vasudevan, S., Sagripanti, J.L. and Wu, C.H. (2009) Sequence  
773 signatures in envelope protein may determine whether flaviviruses produce hemorrhagic or  
774 encephalitic syndromes. *Virus genes*, **39**, 1-9.
- 775 49. Long, F., Doyle, M., Fernandez, E., Miller, A.S., Klose, T., Sevvana, M., Bryan, A., Davidson, E.,  
776 Doranz, B.J., Kuhn, R.J. *et al.* (2019) Structural basis of a potent human monoclonal antibody  
777 against Zika virus targeting a quaternary epitope. *Proceedings of the National Academy of*  
778 *Sciences of the United States of America*, **116**, 1591-1596.
- 779 50. Niu, X., Zhao, L., Qu, L., Yao, Z., Zhang, F., Yan, Q., Zhang, S., Liang, R., Chen, P., Luo, J. *et al.*  
780 (2019) Convalescent patient-derived monoclonal antibodies targeting different epitopes of E  
781 protein confer protection against Zika virus in a neonatal mouse model. *Emerging microbes &*  
782 *infections*, **8**, 749-759.
- 783 51. Sapparapu, G., Fernandez, E., Kose, N., Bin, C., Fox, J.M., Bombardi, R.G., Zhao, H., Nelson, C.A.,  
784 Bryan, A.L., Barnes, T. *et al.* (2016) Neutralizing human antibodies prevent Zika virus replication  
785 and fetal disease in mice. *Nature*, **540**, 443.
- 786 52. Wang, Q., Yang, H., Liu, X., Dai, L., Ma, T., Qi, J., Wong, G., Peng, R., Liu, S., Li, J. *et al.* (2016)  
787 Molecular determinants of human neutralizing antibodies isolated from a patient infected with  
788 Zika virus. *Science Translational Medicine*, **8**, 369ra179-369ra179.
- 789 53. Liu, Z.-Y., Li, X.-F., Jiang, T., Deng, Y.-Q., Ye, Q., Zhao, H., Yu, J.-Y. and Qin, C.-F. (2016) Viral RNA  
790 switch mediates the dynamic control of flavivirus replicase recruitment by genome cyclization.  
791 *eLife*, **5**, e17636.

792 **Figure legends**

793

794 **Figure 1. *In vivo* adaptation of Zika virus clinical isolate SW01 in neonatal**  
795 **mice.**

796 **(A).** DP2 (2 days postnatal) Balb/c mice were intracranially (i.c.) infected with  
797 1,000 PFU SW01. Brains were collected from day 2 to day 12 after infection  
798 and homogenized. Virus titers of brains were tested by standard plaque assay.

799 **(B).** Schema of Zika virus *in vivo* passaging model; Homogenate supernatant  
800 of infected mouse brain at 8 dpi was collected and used for the next round  
801 infection in naïve DP2 Balb/c mice. This process was repeated for 11 rounds to  
802 obtain a mouse adaptive virus MA-SW01. **(C).** Virus titers from MA-P1 to MA-  
803 P11 (MA-SW01) were determined by standard plaque assay. The summary  
804 data were presented as mean  $\pm$  standard deviation (SD).

805

806 **Figure 2. Adapted MA-SW01 virus is more virulent than its parental virus**  
807 **SW01.**

808 **(A-D).** DP2 Balb/c mice were injected i.c. with 100 PFU SW01, MA-SW01, or  
809 PBS. **(A-B).** The morbidity of SW01 and MA-SW01 infected mice (Clinical Score:  
810 0-health, 1-Manic and limb weakness, 2-limb paralysis, 3-Moribund or  
811 death); **(C).** Survival was monitored from 0 to 25 days post infection; **(D).** Body  
812 weight was analyzed at 3, 5, 7, and 11 days post infection. The summary data  
813 were presented as mean  $\pm$  standard deviation (SD). Survival rate and body  
814 weight were analyzed by log rank test and two-way ANOVA respectively; P  
815 values were indicated by \* ( $p < 0.05$ ), or \*\* ( $p < 0.01$ ), or \*\*\* ( $p < 0.001$ ).

816

817

818 **Figure 3. Increased virulence of MA-SW01 is associated with elevated**  
819 **neurotropism.**

820 **(A).** DP2 Balb/c mice were infected s.c. with 100 PFU SW01 or MA-SW01 virus .

821 Virus RNA loads in tissues (brain, blood, spleen, liver and kidney) at 3 days  
822 post infection (3 dpi) and 6 days post infection (6 dpi) after infection were  
823 determined by real-time PCR; dotted lines denote the limit of detection of the  
824 real-time PCR. **(B-C)**. DP2 Balb/c mice were infected i.c. with 100 PFU SW01  
825 or MA-SW01 virus. Virus loads of brain at 3 dpi and 6 dpi was determined by  
826 real-time PCR; **(D)**. DP2 Balb/c mice were infected s.c. with 100 PFU SW01 or  
827 MA-SW01 virus. Virus E protein expression in whole brain (both coronal and  
828 sagittal dissection) at 6 days post infection was detected by fluorescence  
829 immunoassay (IFA); The summary data were presented as mean  $\pm$  standard  
830 deviation (SD) and analyzed by student's t test; P values were indicated by \*  
831 ( $p < 0.05$ ), or \*\* ( $p < 0.01$ ), or \*\*\* ( $p < 0.001$ ).

832

833 **Figure 4. NGS analyses of the MA-SW01 virus identify 4 high frequency**  
834 **nonsynonymous mutations on E and NS2A genes.**

835 **(A-B)**. Virus RNA extracted from SW01 and MA-SW01 was used to construct  
836 the sequence library, and then sequenced by the next generation sequencing  
837 (NGS) method. Quantification and plotting of mutation frequency were  
838 performed by CLC Genomic Workbench and Origin software. **(A)**. Plots of  
839 missense mutations frequency across the ORF of MA-SW01 in reference to  
840 consensus sequence of SW01; Nucleotides with frequency higher than 80%  
841 reads were shown (Red nucleotide abbreviations represent missense  
842 mutations, and green ones are silent mutations). Dotted lines denote the  
843 frequency of 80%. **(B)**. Amino acid changes corresponding to missense  
844 mutations.

845

846 **Figure 5. Increased virulence of Zika virus is associated with specific**  
847 **mutations on E protein but not on NS2A protein.**

848 **(A)**. Scheme of mutation strategy based on pFLZIKV (CAM-WT) infectious  
849 clone to create CAM-M1 (CM1), CAM-M2 (CM2), CAM-M3 (CM3) viruses; **(B)**.  
850 IFA of Zika virus E protein expression at indicated times (24, 48, 72 hours post



851 infection) in BHK-21 cells transfected with RNA from CAM- WT or mutant  
852 viruses (CM1, CM2, CM3). **(C)**. Survival curve of DP2 Balb/c mice infected i.c.  
853 with 10 PFU CAM-WT, mutant viruses (CM1, CM2, CM3), or PBS. **(D-H)**. DP2  
854 Balb/c mice were infected s.c. with 100 PFU CAM-WT, mutant viruses, or PBS.  
855 **(D)**. Survival was monitored and analyzed from 0 to 25 days post infection; **(E-**  
856 **F)**. Body weight difference between PBS-Ctl (PBS), CAM-WT (WT) and CAM-  
857 M1 (CM1) groups at 3 and 11 days post infection (3 dpi and 11 dpi); **(G-H)**. The  
858 morbidity of CAM-WT and CAM-M1 groups (clinical score: 0-health, 1-manic  
859 and limb weakness, 2-limb paralysis, 3-moribund or death); the summary data  
860 were presented as mean  $\pm$  standard deviation (SD) and analyzed by student's  
861 t test; P values were indicated by \* ( $p < 0.05$ ), or \*\* ( $p < 0.01$ ), or \*\*\* ( $p < 0.001$ ).

862

863 **Figure 6. Increased virulence of Zika virus is associated with a single**  
864 **D67N mutation on E protein.**

865 **(A)**. Progressive changes of mutation frequency of 67 and 68 amino acids in E  
866 protein from SW01 (P0) to MA-SW01 (MA-P11) during *in vivo* passaging. **(B)**.  
867 Survival curve of DP2 C57/BL6 mice infected s.c. with 100 PFU SW01, MA-P5,  
868 MA-P8, MA-P10, or PBS. **(C)**. Strategy to construct a single D67N substitution  
869 virus (CM1-A) based on CAM-WT infectious clone; **(D)**. IFA of Zika virus E  
870 protein expression at indicated times (24, 48, 72 hours post infection) in BHK-  
871 21 cells transfected with RNA from CAM-WT and CM1-A. **(E)**. Survival curve of  
872 DP2 C57/BL6 mice inoculated s.c. with 100 PFU CM1, CM1A virus, or PBS.  
873 Survival rate was analyzed by log rank test; P values were indicated by \*  
874 ( $p < 0.05$ ), or \*\* ( $p < 0.01$ ), or \*\*\* ( $p < 0.001$ ).

875

876 **Figure 7. Molecularly cloned Zika virus with a single D67N mutation on E**  
877 **protein has marked increase in the infection of brain tissues.**

878 **(A)**. DP2 Balb/c mice were infected s.c. with 100 PFU CAM-WT or CM1 . Virus  
879 RNA loads in tissues (brain, blood, spleen, liver and kidney) at 3 days post  
880 infection (3 dpi) and 11 days post infection (11 dpi) were determined by real-

881 time PCR;**(B)**. DP2 Balb/c mice were infected s.c. with 100 PFU CAM-WT or  
882 CM1-A. Virus RNA loads in brains at 3dpi and 11dpi were determined by real  
883 time PCR; **(C-D)**. DP2 Balb/c mice were infected i.c. with 20 PFU CAM-WT,  
884 CM1 and CM1-A. Virus RNA load in brains at 3 dpi **(C)**and 11 dpi **(D)** were  
885 determined by real-time PCR; The summary data were presented as mean  $\pm$   
886 standard deviation (SD) and analyzed by student's t test; P values were  
887 indicated by \* ( $p < 0.05$ ), or \*\* ( $p < 0.01$ ), or \*\*\* ( $p < 0.001$ ).

888



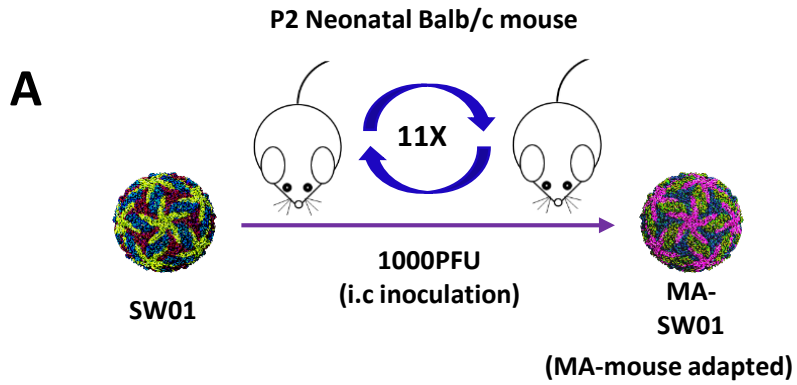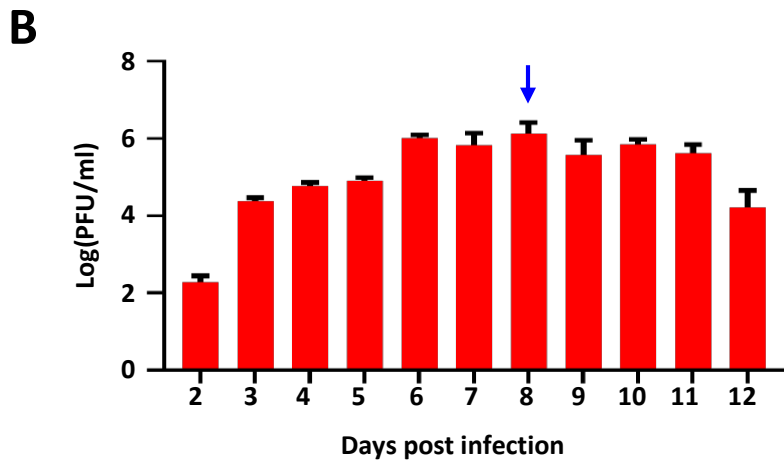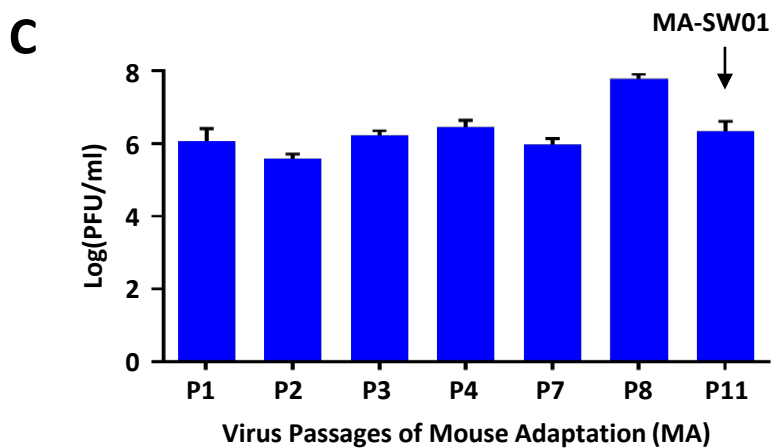

Liu *et al.* Figure 1.

***In vivo* adaptation of ZIKV clinical isolate SW01 in neonatal mice.**

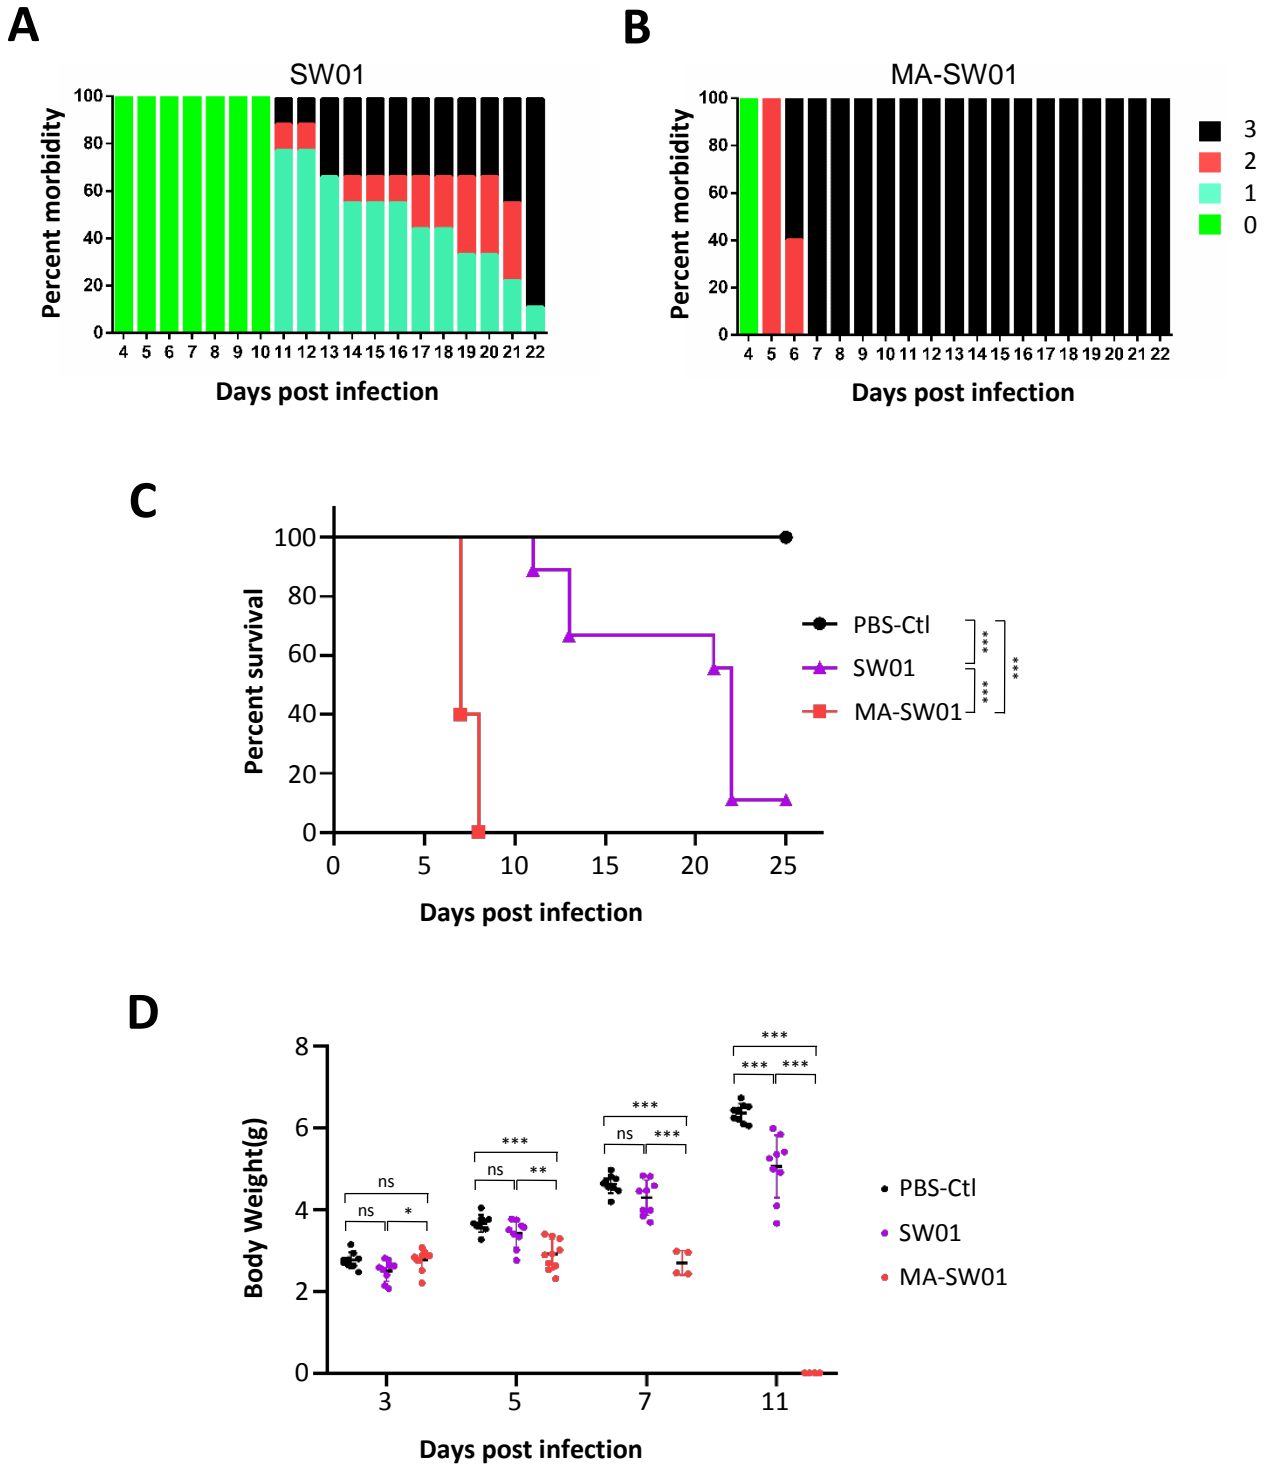

Liu *et al.* Figure 2.

Adapted MA-SW01 virus is more virulent than its parental virus SW01.

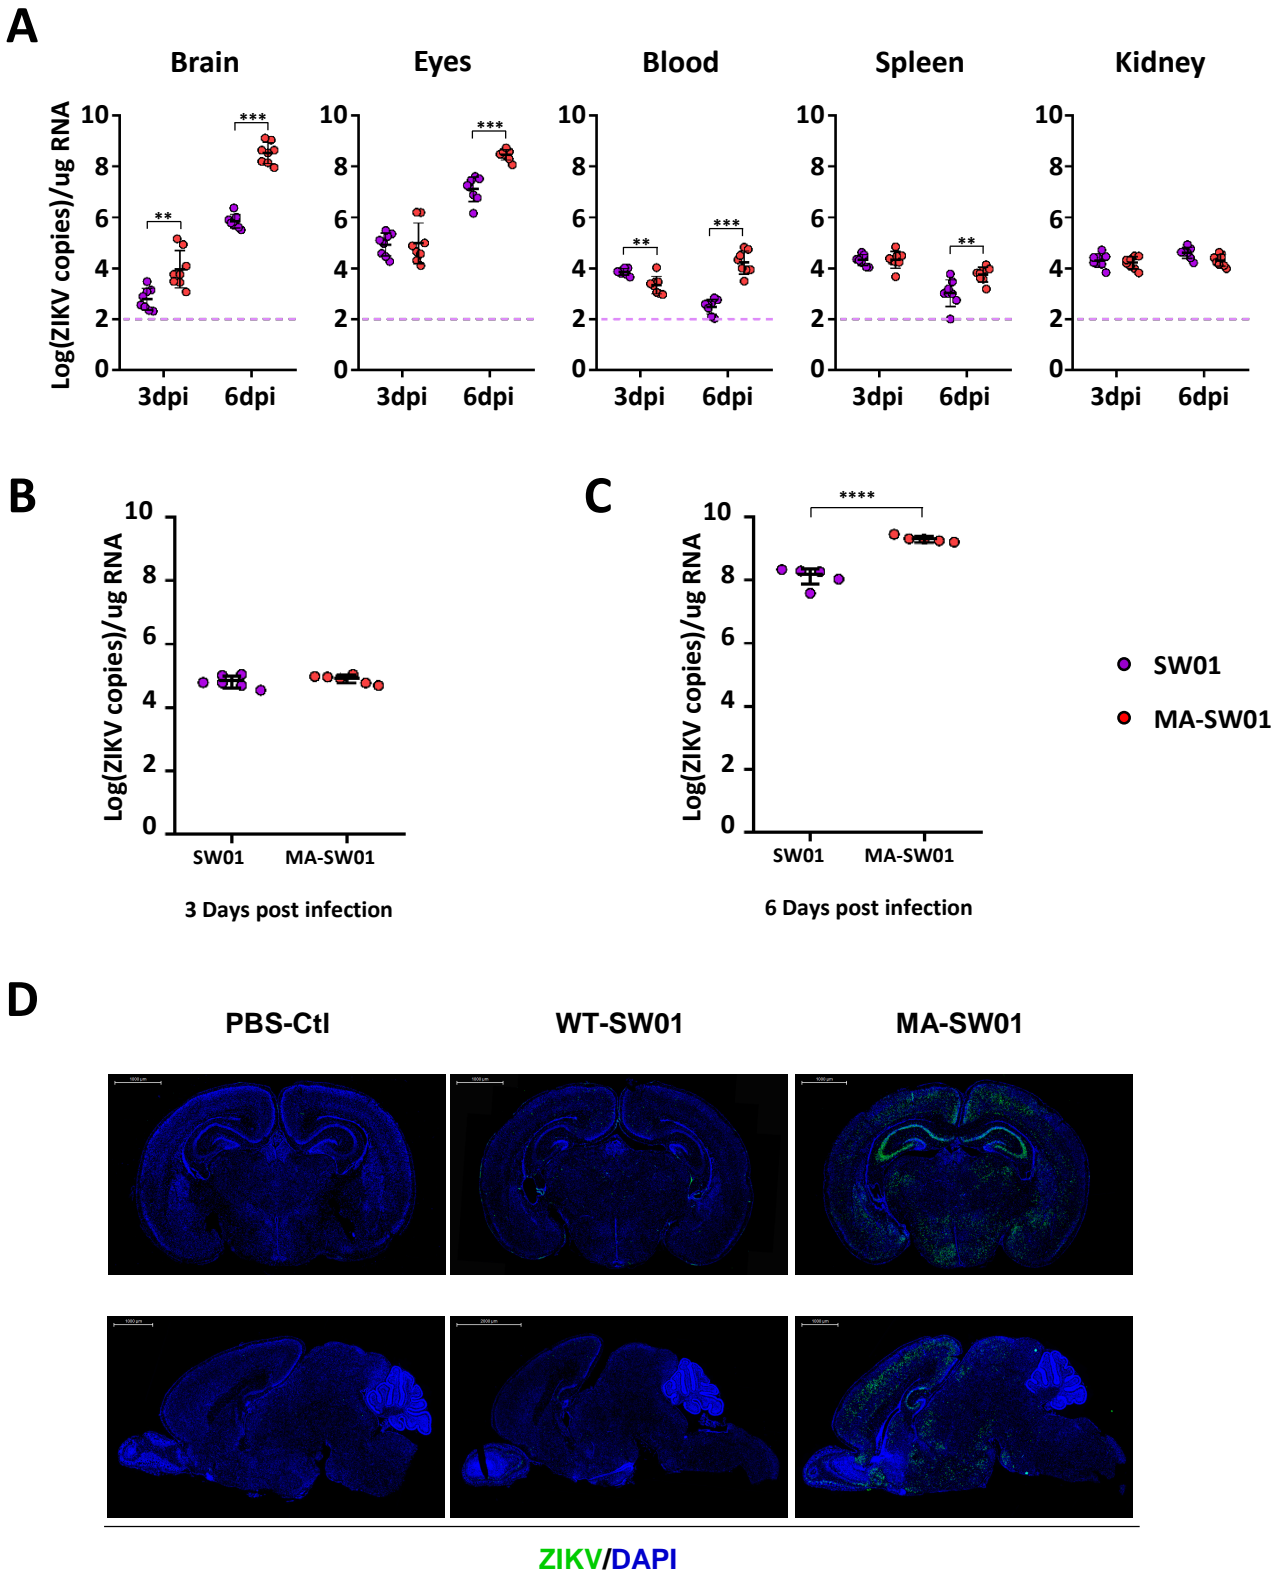

Liu *et al.* Figure 3.

**Increased virulence of MA-SW01 is associated with elevated neurotropism**

**A****MA-SW01 (MA-P11)**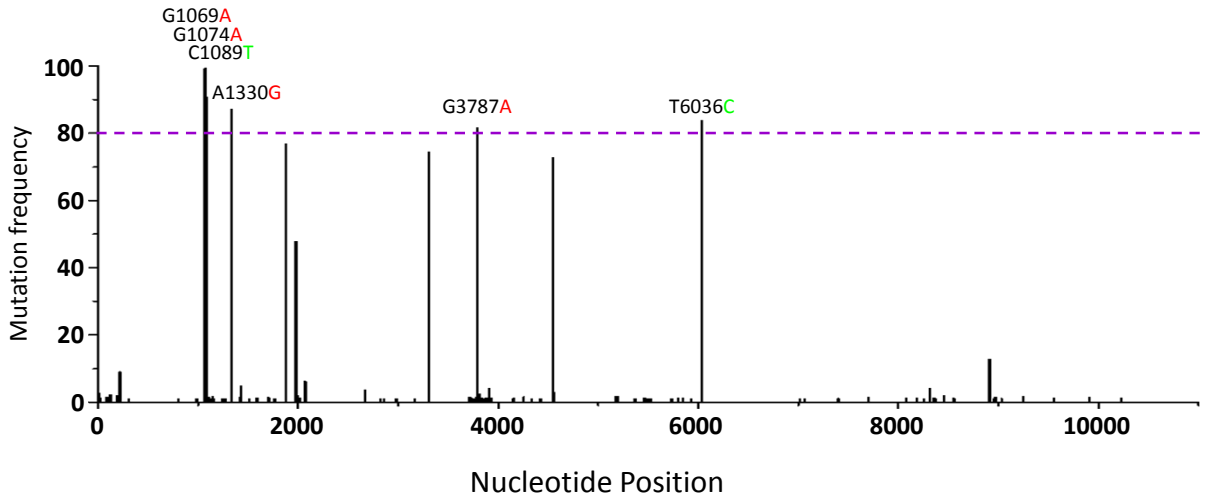**B**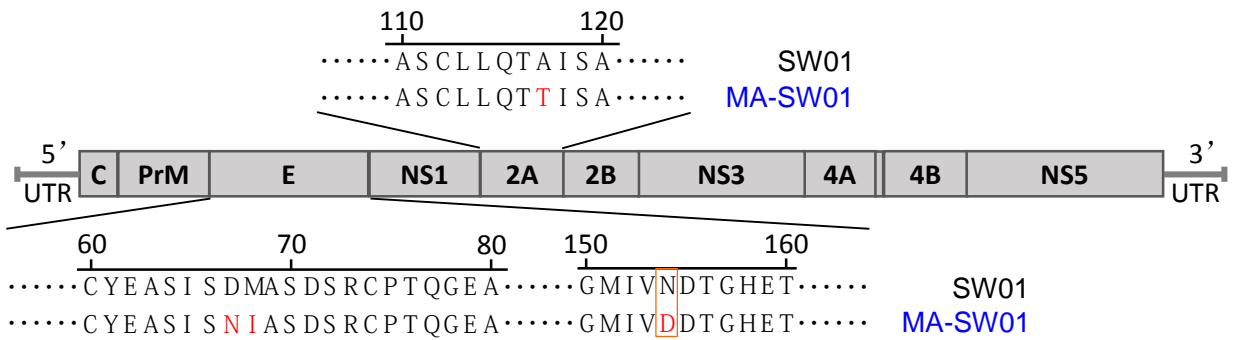Liu *et al.* Figure 4.

**NGS analyses of the MA-SW01 virus identify 4 high frequency nonsynonymous mutations on E and NS2A genes.**

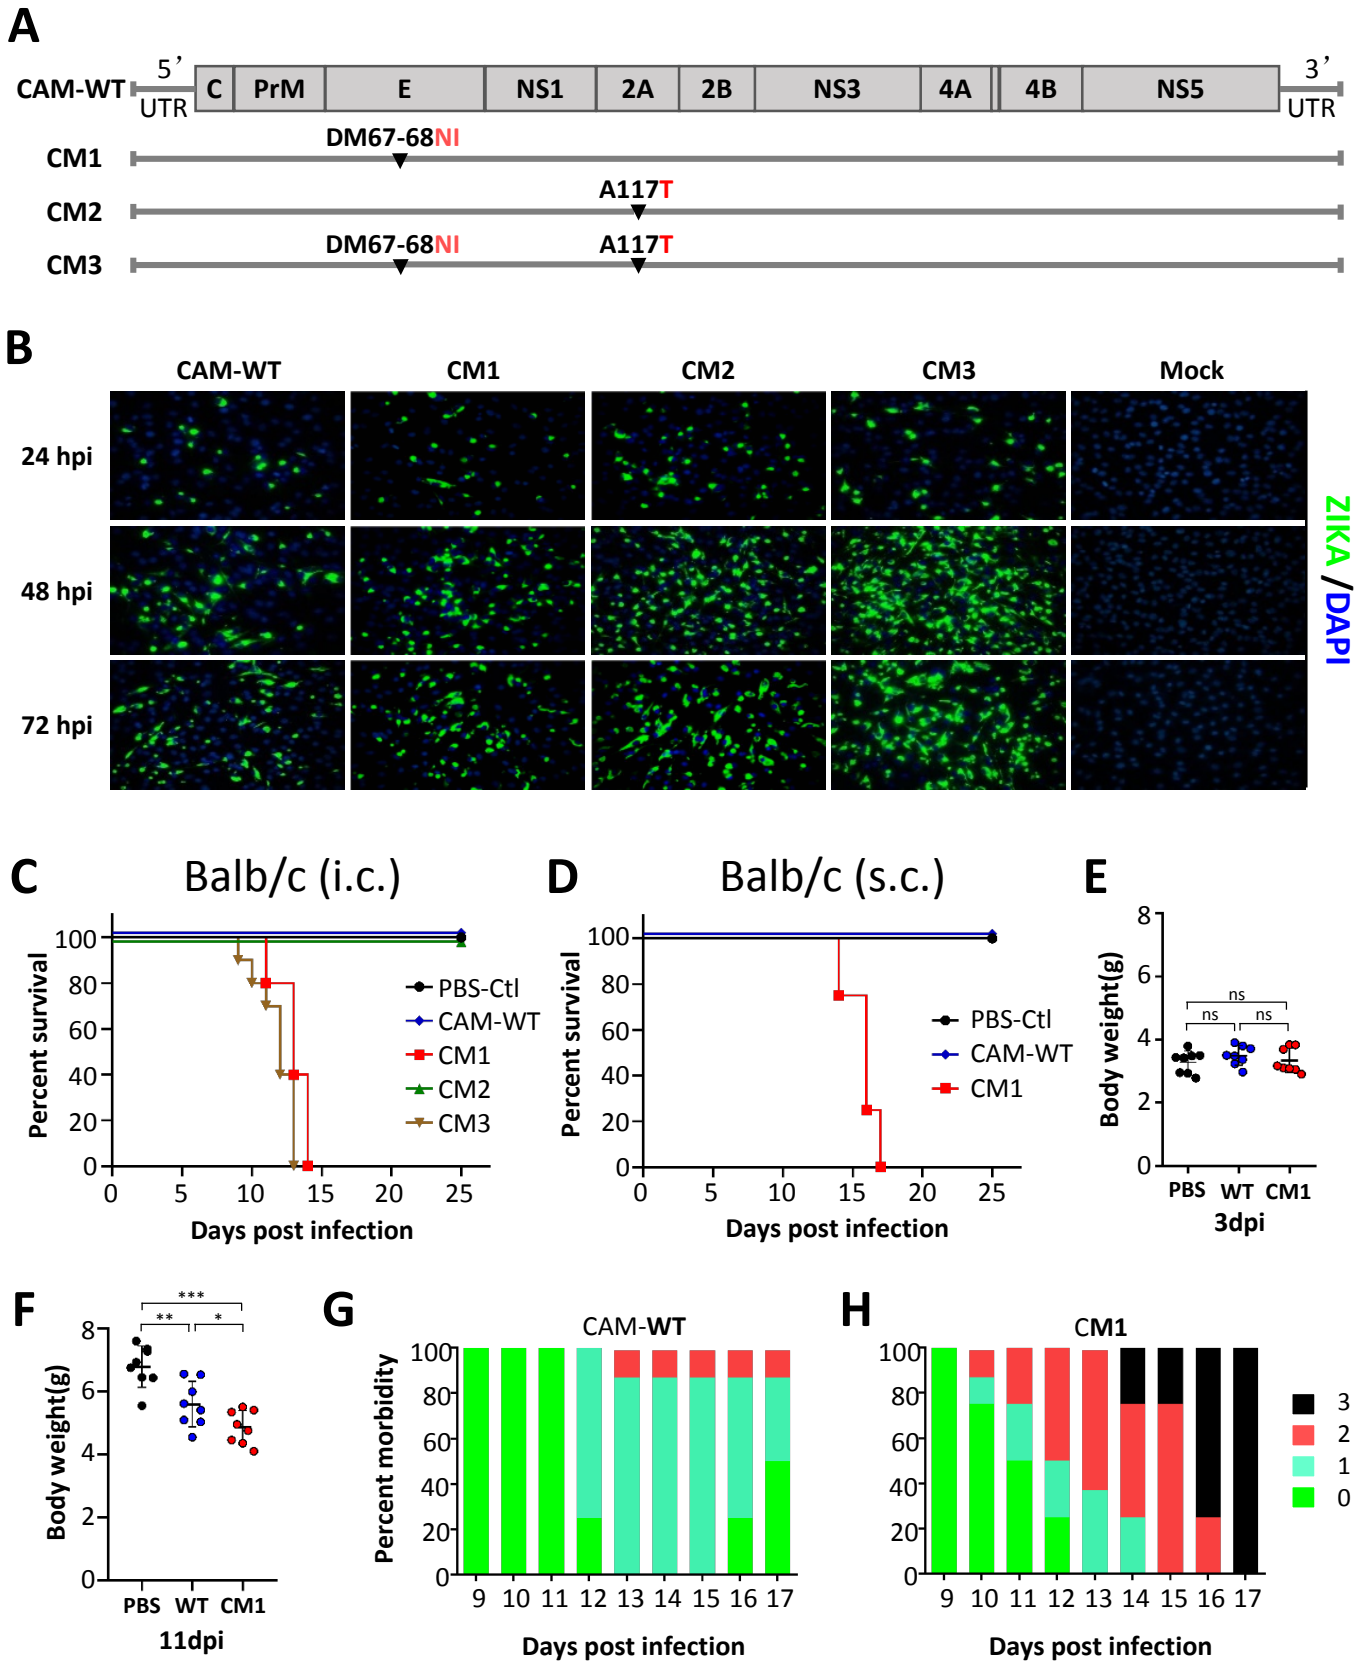

Liu *et al.* Figure 5.

**Increased virulence of ZIKV in association with specific mutations on E protein but not on NS2A protein.**

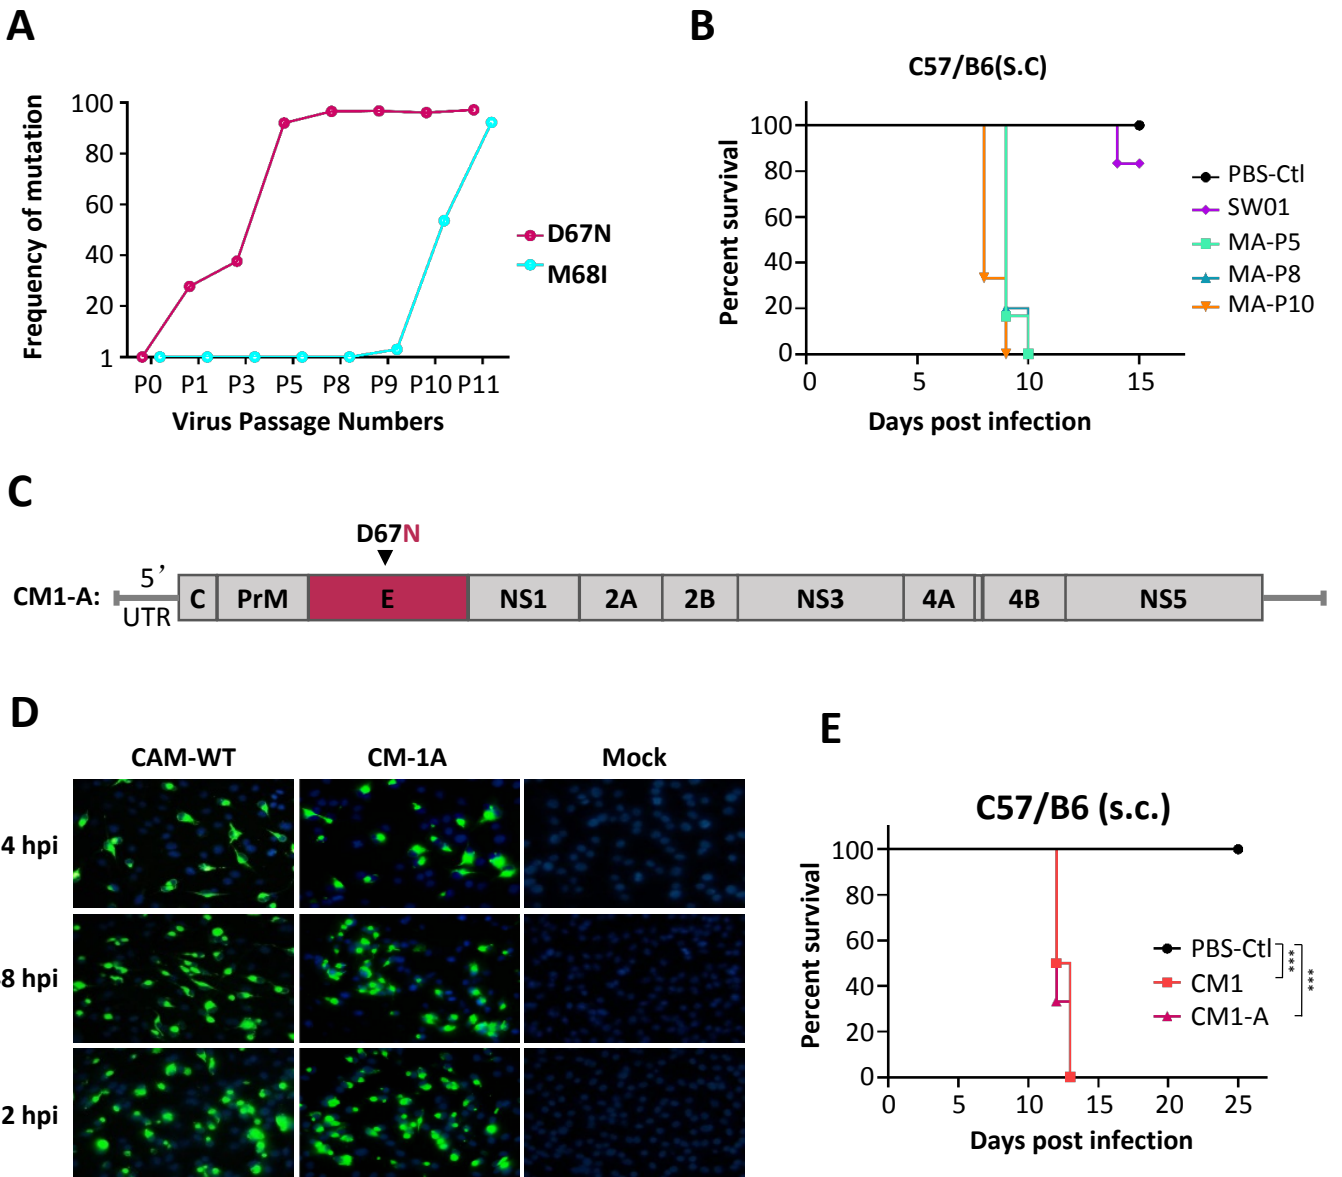

Liu *et al.* Figure 6.

Increased virulence of ZIKV is associated with a D67N single mutation on E protein.

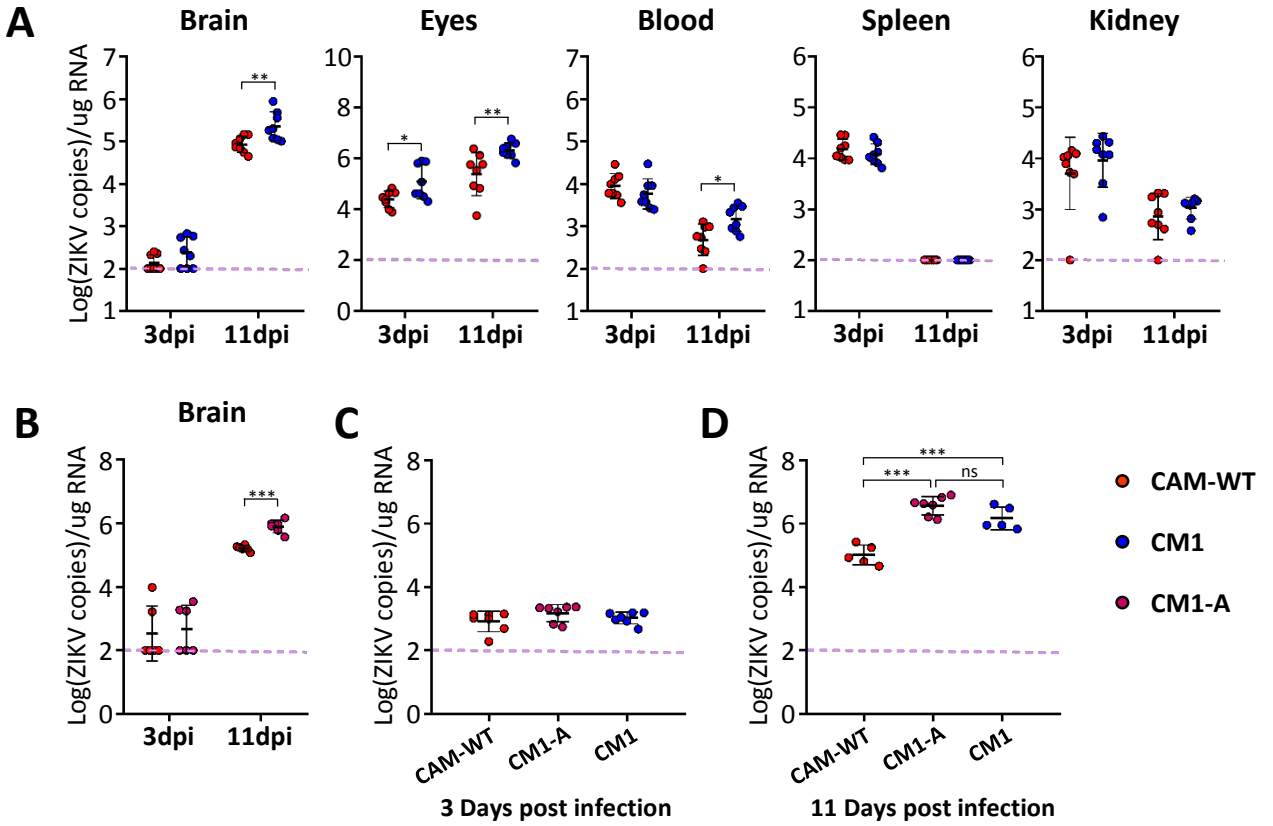

Liu *et al.* Figure 7.

Molecularly cloned ZIKV with a D67N single mutation on E protein has marked increase in the infection of brain tissues.

**Table 1. Deduced amino acid polymorphism at the 67 site of ZIKA E protein of WT-SW01 strain**

| Reads*<br>(1069 of ORF) | Nucleotide polymorphism<br>(1069 of ORF) | Amino acid polymorphism<br>(67 of Envelope) | Percentage of total Reads |
|-------------------------|------------------------------------------|---------------------------------------------|---------------------------|
| 18167                   | 1069 (G,T,C)                             | 67 (Asp, Tyr, His)                          | 99.945%                   |
| 10                      | 1069 (A)                                 | 67 (Asn)#                                   | 0.055%                    |

\*: Based on deep sequencing

#: The D67N mutation presents at low frequency in the original viral isolate.
